## Review Article

# Anorexigenic neuropeptides as anti-obesity and neuroprotective agents: exploring the neuroprotective effects of anorexigenic neuropeptides

Veronika Strnadová<sup>1,\*</sup>, Andrea Pačesová<sup>1,\*</sup>, Vilém Charvát<sup>1</sup>, Zuzana Šmotková<sup>1</sup>, Blanka Železná<sup>1</sup>, Jaroslav Kuneš<sup>1,2</sup> and  Lenka Maletínská<sup>1</sup>

<sup>1</sup>Department of Biochemistry and Molecular Biology, Institute of Organic Chemistry and Biochemistry, Czech Academy of Sciences, Prague, Czech Republic; <sup>2</sup>Department of Biochemistry and Molecular Biology, Institute of Physiology, Czech Academy of Sciences, Prague, Czech Republic

**Correspondence:** L. Maletínská (maletin@uochb.cas.cz)

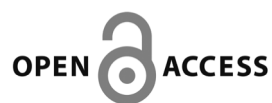

Since 1975, the incidence of obesity has increased to epidemic proportions, and the number of patients with obesity has quadrupled. Obesity is a major risk factor for developing other serious diseases, such as type 2 diabetes mellitus, hypertension, and cardiovascular diseases. Recent epidemiologic studies have defined obesity as a risk factor for the development of neurodegenerative diseases, such as Alzheimer's disease (AD) and other types of dementia. Despite all these serious comorbidities associated with obesity, there is still a lack of effective antiobesity treatment. Promising candidates for the treatment of obesity are anorexigenic neuropeptides, which are peptides produced by neurons in brain areas implicated in food intake regulation, such as the hypothalamus or the brainstem. These peptides efficiently reduce food intake and body weight. Moreover, because of the proven interconnection between obesity and the risk of developing AD, the potential neuroprotective effects of these two agents in animal models of neurodegeneration have been examined. The objective of this review was to explore anorexigenic neuropeptides produced and acting within the brain, emphasizing their potential not only for the treatment of obesity but also for the treatment of neurodegenerative disorders.

## Introduction

The regulation of food intake and energy homeostasis is a very complex process in which both central and peripheral mechanisms are involved [1]. The central nervous system (CNS), mainly the hypothalamus, is a key regulator of energy homeostasis and is responsible for coordinating physiological processes related to hunger and satiety to maintain energy balance through long-term and short-term signals [2]. These signals are integrated and further processed in the arcuate nucleus (ARC) which is a nucleus at the base of the third ventricle adjacent to the media eminence (ME), one of the circumventricular organs with fenestrated capillaries that allows the transport of different molecules and hormones from the periphery to the brain [3,4]. The ARC contains two distinct populations of neurons with antagonistic properties. The first population produces food intake-stimulating orexigenic neuropeptides, such as neuropeptide Y (NPY) and agouti-related peptide (AgRP), while the second population produces food intake suppressing anorexigenic pro-opiomelanocortin (POMC) and cocaine- and amphetamine-regulated transcript (CART) peptide [5]. One of the peripheral hormones that influence the expression of these neuropeptides in the ARC is leptin, the main regulator of energy balance produced in white adipose tissue (WAT) [6]. Its level in

\*These authors contributed equally to this work.

Received: 31 January 2024  
Revised: 26 March 2024  
Accepted: 05 April 2024

Accepted Manuscript online:  
05 April 2024  
Version of Record published:  
24 April 2024

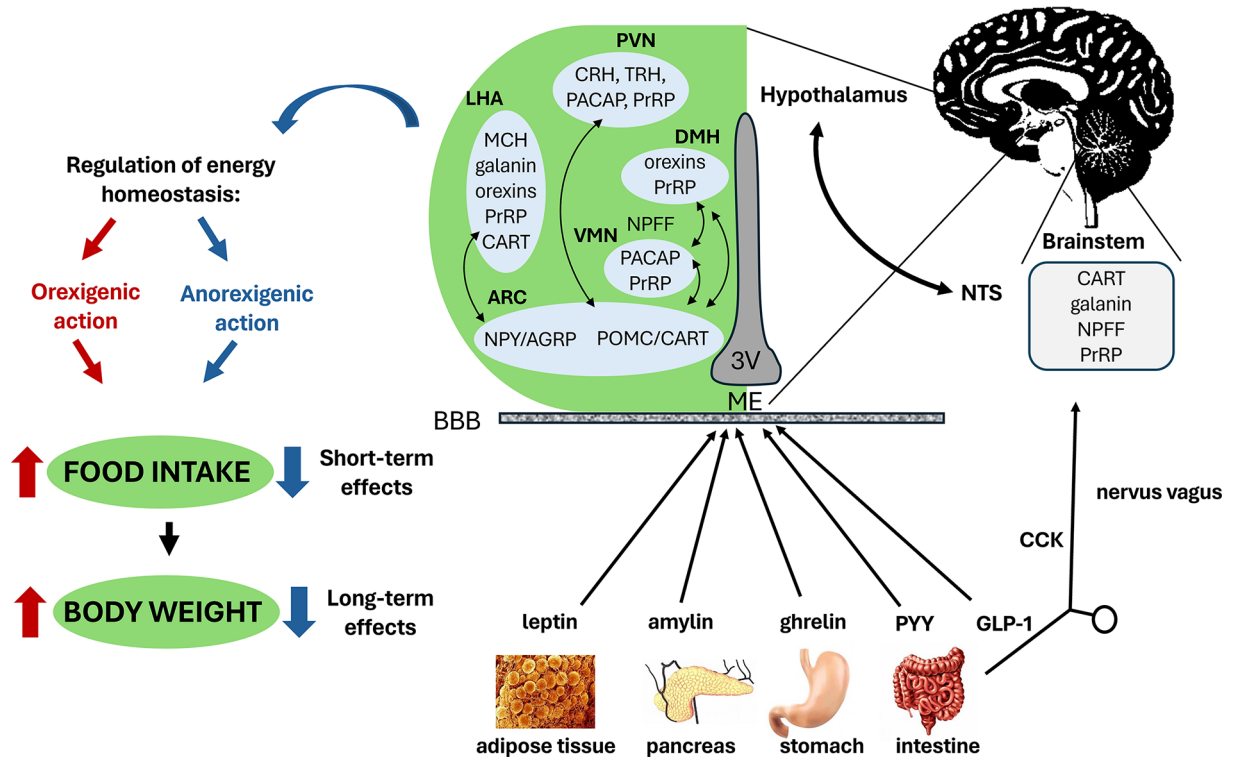

**Figure 1. Scheme of peptides involved in food intake regulation**

Food intake regulating peptides are produced in the periphery, as well as in the brain. The main regulators of energy homeostasis are anorexigenic (food intake lowering) leptin, produced by white adipose tissue, and orexigenic (food intake stimulating) ghrelin, produced by the stomach. Many other anorexigenic hormones are produced in the gastrointestinal tract, for example, amylin, cholecystokinin (CCK), glucagon-like peptide 1 (GLP-1), or peptide YY (PYY). To induce biological effects, these peptides must penetrate to the brain; either through nervus vagus to the nucleus of the solitary tract (NTS) or through the blood–brain barrier (BBB) to the hypothalamus that is the main center of food intake regulation. In the arcuate nucleus (ARC), located at the base of the third ventricle (3V) adjacent to the media eminence (ME), two distinct populations of neurons regulate food intake with antagonistic effects: anorexigenic pro-opiomelanocortin (POMC) and cocaine- and amphetamine-regulated transcript (CART) peptide, alongside orexigenic neuropeptide Y (NPY) and agouti-related peptide (AgRP). These neuronal populations project to other hypothalamic nuclei, such as ventromedial nucleus (VMN), dorsomedial nucleus (DMN), lateral hypothalamic area (LHA), and paraventricular nucleus (PVN), where are expressed other anorexigenic (corticotropin-releasing hormone [CRH], neuropeptide FF [NPFF], pituitary adenylate cyclase-activating peptide [PACAP], prolactin-releasing peptide [PrRP], and thyrotropin-releasing hormone [TRH]) or orexigenic neuropeptides (galanin, melanin-concentrating hormone [MCH], orexins).

the blood plasma is proportional to the total amount of WAT [7]. Leptin decreases food intake by inhibiting orexigenic NPY/AgRP neurons and simultaneously stimulating anorexigenic POMC/CART neurons [8]. Moreover, leptin decreases the accumulation of fat in the body [9]. This effect of leptin is an example of cooperation among peptides from the periphery and neuropeptides (Figure 1). Another important peripheral hormone that regulates ARC neuropeptides is ghrelin, the only known peripheral orexigenic compound produced in the stomach [10]. Other anorexigenic peptide hormones important for the regulation of food intake, such as amylin [11], cholecystokinin (CCK) [12], glucagon-like peptide 1 (GLP-1) [13], or peptide YY (PYY) [14], are secreted in the periphery (reviewed [15–17]). However, the objective of this review is to focus on neuropeptides, defined as peptides produced within the nervous system that are released by various populations of neurons and function within the brain.

Neuropeptides produced from the ARC influence other hypothalamic areas, such as the paraventricular nucleus (PVN), ventromedial nucleus (VMN), dorsomedial hypothalamic nucleus (DMH), and lateral hypothalamic area (LHA) thereby affecting the release of other neuropeptides, both orexigenic (galanin, melanin-concentrating hormone [MCH], and orexins) [18–20] and anorexigenic (corticotropin-releasing hormone [CRH], pituitary adenylate cyclase-activating peptide [PACAP], prolactin-releasing peptide [PrRP], and thyrotropin-releasing hormone [TRH]) [21–25]. From these areas the impulses are projected to the thalamus [26] and are integrated with signals from the

brainstem, mainly from the nucleus of the solitary tract (NTS) [27]. When the balance between energy input and output works, physiological equilibrium is maintained. There is currently no effective system for monitoring the caloric intake of individual organs and tissues. Consequently, monitoring fat store bulkiness could be an appropriate approach; if these stores remain unchanged, the energy balance is satisfactory [28]. However, if there is excess energy stored in fat tissue, obesity and its associated comorbidities, such as type 2 diabetes mellitus (T2DM), hypertension, cardiovascular diseases, and metabolic syndrome [8,29,30], develop. Recently, obesity has also been associated with the development of neurodegenerative diseases [31] representing a significant and escalating global challenge. Typically, neurodegenerative diseases exhibit delayed onset, and progressive clinical symptoms and are characterized by neuronal loss [32]. This neuronal loss is known as brain atrophy and leads to memory impairment and dementia [33,34]. Among all neurodegenerative diseases, the most common type is Alzheimer's disease (AD), which accounts for 60–80% of all cases of dementia according to the World Health Organization [35]. AD is characterized by presence of senile plaques formed by amyloid- $\beta$  ( $A\beta$ ), Tau protein hyperphosphorylation, increased neuroinflammation, and decreased synaptogenesis and neurogenesis in the brain [36]. In dementias, including AD, neurodegeneration is associated with aging, leptin and insulin resistance [37,38], inflammation mediated by cytokines [39], oxidative and cellular stress [40], cell death, vascular destruction [41], or dysregulation of the energy balance and metabolism of neuropeptides involved in food intake regulation [42]. These features are also observed in T2DM [43], metabolic syndrome [44], and nonalcoholic fatty liver disease [45]. Therefore, these diseases could be managed through similar, if not identical, therapeutic strategies. Thus, drugs initially developed for obesity treatment might also be useful for the treatment of AD [46], supporting the critical role of neuropeptides in the regulation of neuronal activity [47,48].

While central administration of anorexigenic neuropeptides efficiently decreases food intake and body weight, peripheral application triggers no response due to the inability of neuropeptides to penetrate the brain, where their receptors are expressed. To achieve central biological effects after peripheral administration, such as the abovementioned decrease in food intake, it is necessary to modify neuropeptides to enhance their stability and bioavailability. One example of the improved properties of modified peptides is long-lasting receptor agonists of GLP-1, such as liraglutide, exenatide or lixisenatide, which are on the market as antidiabetic and antiobesity drugs, and currently, their neuroprotective properties are also being investigated in clinical trials [49,50]. In preclinical studies, treatment with liraglutide reduced  $A\beta$  plaques, Tau hyperphosphorylation, and neuroinflammation. Additionally, it increases synaptic plasticity, neurogenesis and enhanced memory [51–54]. However, manipulating the central neuropeptide system poses a real therapeutic challenge, as peripherally injected neuropeptides need to access the brain without causing any side effects.

The objective of this review is to summarize the current knowledge on anorexigenic neuropeptides that are produced and acting within the brain, and their modified analogs capable to act centrally after peripheral administration in animal preclinical models with an emphasis on their possible use for treating obesity and neurodegenerative disorders.

## Orexigenic neuropeptides

Orexigenic neuropeptides, such as NPY, AgRP, MCH, orexins, and galanin, stimulate food intake. Despite their opposite effects on the food intake regulation, orexigenic peptides, like anorexigenic peptides, have shown neuroprotective effects on preclinical models of neurodegenerative diseases. However, they are not the focus of this review.

Decreased NPY levels in different brain regions and plasma have been described in several preclinical models of AD, as well as in patients with AD [55]. NPY can function as an antiapoptotic, anti-inflammatory and neuroprotective agent, as reviewed in [48,56]. Moreover, NPY, implicated in stress response, anxiety, and cognition, also plays an important neuroprotective role in neurodegenerative diseases like Alzheimer's, Parkinson's, and Huntington's disease, where stress is a contributing factor [57]. In the  $A\beta$  mouse model of AD, a sole intracerebroventricular (ICV) injection of NPY mitigates depressive-like behavior, spatial memory deficits, and oxidative stress induced by  $A\beta$  administration [58]. In addition to its role in regulating energy balance, AgRP, produced by AgRP/NPY neurons, exerts influence on various cellular processes. Notably, the ubiquitin proteasome system, crucial for the targeted degradation of short-lived proteins, is typically downregulated in AD. Lee et al. [59] demonstrated that the recombinant human AgRP protein increases proteasome activity in SH-SY5Y cells. Additionally, in 5xFAD mice, administration of AgRP protein led to an increase in proteasome activity and inhibited the accumulation of ubiquitin-conjugated proteins. This suggests that AgRP has the potential to decrease abnormal protein aggregation, thereby potentially slowing down the clinical progression of various neurodegenerative diseases [59].

The orexigenic neuropeptide MCH is produced in LHA neurons that further project to the hippocampal *cornu ammonis* (CA) 1 area, which is connected to memory formation. Mice with knock-in Swedish mutation in amyloid

precursor protein (APP), which leads to the development of the familial form of AD (APP<sup>NL-G-F</sup> mice), presented a decreased MCH level and subsequent aberrant excitation of hippocampal neurons. Thus, MCH deregulation may be involved in the development of the early stages of AD [60]. In the study by Oh et al. [61], MCH peptide was intranasally administered to scopolamine-induced memory-impaired mice to assess acute effects and to AD mouse models to investigate chronic effects. MCH ameliorated memory impairment in these models and reduced soluble A $\beta$  levels in the cerebral cortex of APP/PS1 transgenic mice. Additionally, MCH enhanced long-term potentiation in the hippocampus of both wild-type and 5xFAD AD mouse models [61]. The administration of MCH peptide into the hippocampus and amygdala enhanced the memory performance of rats [62] and reverse the amnesic effects induced by a nitric oxide synthase inhibitor [63], a known disruptor of hippocampal plasticity. N-methyl-D-aspartate (NMDA) receptors play a pivotal role in the remarkable plasticity exhibited by the hippocampus [64] and are fundamentally implicated in the neural mechanisms that underlie specific forms of learning. In hippocampal slices from rats treated with MCH and subjected to a memory task, an increase in the expression of NMDA receptor subunits crucial for synaptic plasticity was observed [64].

Orexin A and orexin B produced in the LHA are involved in sleep/wake processes, appetite, drug addiction and cognitive processes. Orexins also have neuroprotective and anti-inflammatory properties, as reviewed previously [65,66]. Previous studies have indicated that orexin-A exhibits protective effects in cellular models of Parkinson's disease. Liu et al. revealed that orexin-A mitigated the loss of dopaminergic neurons and the reduction in tyrosine hydroxylase expression in the substantia nigra in a mouse model of Parkinson's disease. Orexin-A improved both motor activity and spatial memory in this mouse model and elevated the protein levels of brain-derived neurotrophic factor (BDNF), which promotes neuroprotection and neuroregeneration, in dopaminergic neurons of the substantia nigra [67].

In addition to its orexigenic effect, galanin is involved in a broad range of physiological functions including effects on memory, learning and neurogenesis in the hippocampus [68]. The intranasal coadministration of galanin receptor-2 (GALR2) agonist (M1145) and NPY receptor 1 (NPY1R) agonist improved spatial memory in the Sprague-Dawley rats [68]. Subsequent study revealed a sustained increase in neurogenesis in the dorsal dentate gyrus following ICV administration of GALR2 and NPY1R agonists. Simultaneous delivery of the M1145 and the NPY1R agonist promoted neuroblast proliferation and improvement in object-in-place memory [69]. Additionally, galanin receptor-2/3 agonist (Gal 2-11) induced proliferation of hippocampal precursor cells, thus directly affected hippocampal neurogenesis, impaired in AD, through production of granule cell neurons of the dentate gyrus [70].

## Anorexigenic neuropeptides

Anorexigenic neuropeptides inhibiting food intake include POMC, CART peptide (CARTp), PACAP, PrRP, neuropeptide FF (NPFF), CRH, and THR. The potential of these peptides in the treatment of obesity and neurodegeneration is described in separate chapters. The order was determined according to the expression in individual hypothalamic nuclei.

## Melanocortin system

The melanocortin system includes multiple peptides such as  $\alpha$ ,  $\beta$  and  $\gamma$ -melanocyte-stimulating hormone (MSH), adrenocorticotrophic hormone (ACTH), and  $\beta$ -lipotropin, which are derived from the precursor POMC [71,72]. The precursor protein POMC consists of three main domains whose different cleavages by proprotein convertases produce different molecules, such as  $\gamma$ -MSH from the N-terminal region, ACTH from the central region, which can be further cleaved to  $\alpha$ -MSH, and  $\beta$ -MSH and  $\beta$ -endorphin cleaved from  $\beta$ -lipotropin from the C-terminal domain [73]. The posttranslational processing of POMC occurs in a tissue-specific manner and results in diverse biological functions. The POMC system controls nervous, behavioral, endocrine, and immune functions and has a regulatory and homeostatic roles [71].

These molecules are cleaved from POMC and share the common tetrapeptide core sequence His-Phe-Arg-Trp which interacts with and activates melanocortin receptors (MCRs). MCRs are G protein-coupled receptors (GPCR) that include five receptor variants with multiple physiological functions. MC1R regulates pigmentation in melanocytes, MC2R activates glucocorticoid biosynthesis in the adrenal cortex, MC3R and MC4R influence energy homeostasis in the central nervous system, and MC5R regulates the synthesis and secretion of exocrine gland products [74,75]. ACTH and  $\alpha$ -MSH can activate MC1R, MC3R, MC4R, and MC5R. However, MC2R can be activated by ACTH but not any other melanocortin [74,76]. Additionally, MC3R has a very high binding capacity for  $\gamma$ -MSH, while MC4R has a very high binding capacity for  $\alpha$ - and  $\beta$ -MSH [77]. Orexigenic AgRP is a natural antagonist of MC3R and MC4R activity [78,79].

POMC is highly expressed in endocrine cells of the pituitary gland and neurons of the hypothalamic ARC [75,80]. Melanocortins are part of the anorexigenic system that decreases appetite and food intake, therefore they play an important role in the regulation of body weight homeostasis and energy balance. The primary effects of POMC-derived peptides on feeding and body weight are mediated by MSH peptides and their effects on MC3R and MC4R [81]. MC3R and MC4R have been investigated as promising targets for anti-obesity drugs [82–84]. Humans deficient in POMC or MC4R are hyperphagic and severely obese [85,86]. Additionally, MC3R mutation variants cause robust obesity in humans [77]. An obese phenotype is also evident in knockout (KO) MC3R and MC4R mice. While MC4R KO mice exhibit hyperphagia and develop T2DM, MC3R KO mice are not hyperphagic and have a normal metabolic response [87].

$\alpha$ -MSH, produced in the ARC and acting at MC4R in the PVN is important for the regulation of food intake and energy balance and is one of the main mediators of the effects of leptin [72]. The ICV administration of melanotan II (MTII) a cyclic melanocortin agonist with the sequence Ac-Nle<sup>4</sup>-c[Asp<sup>5</sup>,D-Phe<sup>7</sup>,Lys<sup>10</sup>] $\alpha$ -MSH-[4–10]-NH<sub>2</sub> resulted in a significant reduction in food intake and body weight in male Sprague-Dawley rats fed a high-fat diet (HFD) [88]. Interestingly, consumption of a HFD decreases signaling through the melanocortin system. Rats maintained on a HFD were less sensitive to the inhibition of food intake induced by MTII [89]. MTII is a potent agonist of both MC3R and MC4R, and when MTII is administered via the ICV, it inhibits acute food intake in fasted mice [90] but has no effect on food intake in fasted Mc4r<sup>-/-</sup> mice [91,92]. Another MC4R peptide agonist, the lipidized analog of  $\alpha$ -MSH [93], called MC4-NN1-0182, was investigated in rats with diet-induced obesity (DIO) and DIO minipigs. Long-term treatment with MC4-NN1-0182 resulted in a decrease in food intake and body weight [94]. Moreover, DIO rats exhibit reduced levels of leptin, cholesterol, and insulin, with a slight increase in oxygen consumption [94].  $\alpha$ -MSH activates a thermogenic gene program and increases the mitochondrial respiratory rate in adipocytes and inguinal WAT of DIO mice. Without affecting food intake, peripheral administration of  $\alpha$ -MSH decreased body weight and inguinal WAT mass [95].

Another melanocortin analog, cyclic peptide setmelanotide (also known as BIM-22493), demonstrated a reduction in acute food intake in fasted mice. Interestingly, the inhibition of refeeding after an overnight fast by BIM-22493 was dependent on functional MC4R and did not require MC3R [96]. Chronic treatment of DIO mice with BIM-22493 resulted in weight loss and improvements in hyperinsulinemia and fatty liver. However, treatment with BIM-22511 did not impact body weight in MC4R KO mice but did reduce body weight in MC3R KO mice. Additionally, chronic treatment with BIM-22511 did not improve hepatosteatosis in MC4R KO mice and did not affect hepatic lipogenic gene expression. MC4R is necessary for melanocortin agonist-induced weight loss and improvements in liver metabolism but is not required for improvements in hyperinsulinemia [96].

$\alpha$ -MSH and its analogs have been proposed to exhibit neuroprotective and anti-inflammatory effects and represent a potential strategy for treating AD [97]. Concentrations of  $\alpha$ -MSH in the brain and cerebrospinal fluid of AD patients were reduced, correlating with cognitive dysfunction [98,99]. Activation of POMC-derived neuropeptides and MCRs has previously been shown to rescue the impairment of synaptic plasticity in a mouse model of AD. Treatment with  $\alpha$ -MSH preserved the expression of the GABAergic marker GAD67 (glutamic acid decarboxylase 67) promoted the survival of GABAergic GAD67+ inhibitory interneurons in the hippocampus and improved spatial memory in the TgCRND8 mouse model of AD with Swedish and Indiana mutations in APP [100]. In ischemic rats, which display a reduced number of neurons with pathological morphological changes in the CA1 pyramidal cell layer of the hippocampus, treatment with  $\alpha$ -MSH leads to an increase in the number of viable hippocampal neurons. Additionally,  $\alpha$ -MSH decreases glial activation, as indicated by the reduction in glial fibrillary acidic protein (GFAP), an astrocyte marker that is markedly elevated in ischemic rats. Therefore, the neuroprotective effect of  $\alpha$ -MSH could be attributed to the reduction of damage caused by reperfusion. However, further studies will be necessary to determine whether the neuroprotective effect of  $\alpha$ -MSH is mediated by its anti-inflammatory actions [101].

The melanocortin analog [Nle<sup>4</sup>, D-Phe<sup>7</sup>] $\alpha$ -MSH (NDP- $\alpha$ -MSH) has been shown to improved learning and memory, as well as increase neurogenesis in Mongolian gerbils [102]. The effect of chronic administration of NDP- $\alpha$ -MSH was investigated in several mouse models of AD – in 3xTg mice, a model of AD containing three human mutations, APP<sub>Swe</sub>, presenilin 1 (PS1)<sub>M146V</sub>, and Tau<sub>P301L</sub> [103,104]; in Tg2576 mice carrying the APP<sub>SWE</sub> mutation [105,106]; and in 5XFAD mice with 5 mutations connected to AD-Swedish (K670N/M671L), Florida (I716V), and London (V717I) mutations in APP, and the M146L and L286V mutations in PS1 [104]. NDP- $\alpha$ -MSH improved spatial memory in Morris water maze (MWM) in all mentioned AD mouse models [103–106]. NDP- $\alpha$ -MSH further reduced the level of A $\beta$  deposits in Tg2576 [105] and in 30-week-old 3xTg mice [103]. However, the level of A $\beta$  deposits or astrocytic reactivity were not influenced by NDP- $\alpha$ -MSH in 9- and 14-month-old 3xTg mice or in 5XFAD mice [104]. While NDP- $\alpha$ -MSH did not influence microglial reactivity, as indicated by ionized calcium binding adaptor molecule 1 (Iba1) staining, in 5XFAD mice, it reduced microglial reactivity in the CA3 region in 3xTg mice [104]. Treatment

also attenuated Tau hyperphosphorylation at different epitopes in 3xTg and 5XFAD mice [103,104] and reduced the level of p38 mitogen-activated protein kinase (MAPK), which is a kinase that is overactivated in patients with AD [107]. Finally, NDP- $\alpha$ -MSH decreased neuronal loss and increased hippocampal expression of the immediate early response gene *Zif268*, suggesting increased synaptogenesis [103,105]. Moreover, it increased the number of bromodeoxyuridine immunoreactive cells, a marker of cell proliferation, which are colocalized with the markers of mature neurons NeuN and *Zif268* in the hippocampus of Tg2576 mice [106]. The central administration of another MCR agonist [d-Tyr<sup>4</sup>]-melanotan II, reduced A $\beta$  levels, improved inflammation and astrocytic activation in the hippocampus and suppressed microglial activation in APP/PS1 mice. It significantly reduced 6E10-immunostained amyloid plaques and decreased levels of both insoluble and soluble A $\beta$ , with reduced levels of isomers A $\beta_{x-42}$  and A $\beta_{x-40}$ . Additionally, the treatment lowered the elevated expression of pro-inflammatory factors interleukin-1 $\beta$  (IL-1 $\beta$ ) and interleukin-6 (IL-6), as well as anti-inflammatory cytokine intercellular adhesion molecule 1 (Icam1). Moreover, [d-Tyr<sup>4</sup>]-melanotan II reduced the increased expression and immunoreactivity of GFAP, particularly in the CA1 zone, and decreased microglial density in the hippocampus [108].

Considering these results, which are summarized in Table 1 and in Table 2,  $\alpha$ -MSH treatment represents a strategy for treating obesity, improving cognitive function, and exerting neuroprotective effects along with increased neurogenesis.

### Cocaine- and amphetamine-regulated transcript peptide (CARTp)

In 1995, Douglass et al. [109] discovered that acute administration of cocaine and amphetamine increased the expression of specific mRNAs; thus, they designated this mRNA CART. The structure of CARTp was identified later, in 1998, when Thim et al. [110] described two CARTp isoforms isolated from the rat hypothalamus, CARTp [55–102] and CARTp [61–102]; both were subsequently confirmed to be biologically active peptides [111–113]. The newly described CARTp was linked to a previously isolated peptide from the ovine hypothalamus with unknown functions [114]. CARTp is evolutionarily conserved across species; there is 95% amino acid identity between active rat and human CART peptides [109,115,116]. The CARTp receptor has not yet been identified. However, there is evidence suggesting that the CARTp receptor could be a GPCR since CARTp [55–102] can inhibit voltage-dependent Ca<sup>2+</sup> channels in primary hippocampal neurons [117]. This inhibitory effect was blocked in cells treated with pertussis toxin, suggesting that CARTp [55–102] mediates this inhibition through the activation of the G proteins G<sub>i/o</sub>. CARTp activated extracellular signal-regulated kinase (ERK) in the mouse pituitary tumor cell line AtT20, where specific binding was observed [118,119]. Our group reported the specific binding of CARTp [61–102] in the nanomolar range to rat pheochromocytoma PC12 cells [120]. The number of binding sites is increased fivefold in PC12 cells differentiated to a neuronal phenotype with nerve growth factor (NGF). Our subsequent study demonstrated the activation of the stress-activated protein kinase/c-jun NH<sub>2</sub>-terminal kinase (SAPK/JNK) pathway in response to CARTp stimulation in PC12 cells [121]. In 2020, Yosten et al. [122] identified the orphan receptor GPR160 as a potential receptor for CARTp, although specific binding of CARTp to GPR160 was not demonstrated in these studies. Our next study did not confirm the presence of GPR160 in PC12 cells [123]. Moreover, no specific binding of CARTp to THP1 cells with high endogenous GPR160 expression or cells transfected with GPR160 was detected. While GPR160 might play a role in CARTp signaling, further studies are needed to identify the receptor for CARTp.

CART is among the most predominant transcripts in the hypothalamus [124], with both CART mRNA and CART immunoreactivity observed in distinct nuclei across the brain, especially in the hypothalamus in the ARC, LHA and PVN, nucleus accumbens, or pituitary, as well as in the periphery, e.g., adrenal glands [125], islets of Langerhans [126] and gut [127]. According to the distribution of CARTp in various brain regions implicated in food intake regulation, it has been proposed that CARTp play a role in the control of eating behavior [125,128]. Since CARTp-deficient mice exhibit late-onset obesity and impaired insulin secretion, these findings were confirmed [129,130]. Subsequent studies of ICV-administered CARTp fragments in rats or mice showed potent food intake-lowering effects, accompanied by the inhibition of NPY neurons [111,131,132]. Moreover, Kristensen et al. demonstrated the importance of leptin in the activation of CART mRNA expression in the ARC. This was supported by the findings of another study in which animals with disrupted leptin signaling were used, which showed almost no expression of the peptide in the brain [133]. The increase in the expression of CARTp after leptin administration [134], the presence of leptin receptors on CART-positive neurons in various regions of the hypothalamus [135], the colocalization of CART with anorexigenic  $\alpha$ -MSH in neurons of the ARC [136] and the concomitant modulatory effect of the release of the energy homeostasis regulator TRH from the pituitary [137,138] indicate the effects of CARTp on feeding and energy expenditure. CARTp is also implicated in CCK-induced satiety [139]; moreover, coadministration of CART peptide (ICV) and CCK (IP) synergistically reduced food intake in fasted mice [140]. Six-day-long infusion of CARTp [55–102] into the right

**Table 1** Effect on food intake and body weight after chronic administration of neuropeptides or their modified analogs in DIO rodent models

| Animal model<br>HFD: starting age and weeks<br>of feeding              | Intervention<br>Compound/ dose/ injection/ duration                                                     | Effects<br>Increased ↑<br>Decreased ↓                                                                                                                                                             | Reference |
|------------------------------------------------------------------------|---------------------------------------------------------------------------------------------------------|---------------------------------------------------------------------------------------------------------------------------------------------------------------------------------------------------|-----------|
| <b>Melanocortins</b>                                                   |                                                                                                         |                                                                                                                                                                                                   |           |
| <b>Sprague-Dawley rats</b> ♂<br>HFD: from 6th week, 12 weeks           | <b>MTII</b><br>0.5 nmol/rat, ICV<br>once                                                                | Reduced food intake<br>Reduced body weight                                                                                                                                                        | [88]      |
| <b>Long-Evans rats</b> ♂<br>HFD: from 6th week, 8 weeks                | <b>MTII</b><br>0.1, 0.3, 1.0 nmol/rat, ICV<br>once                                                      | Reduced food intake                                                                                                                                                                               | [89]      |
| <b>Sprague-Dawley rats</b> ♂<br>HFD: from 7 to 8th week, 10 weeks      | <b>MC4-NN1-0182</b><br>0.5 ml/kg, SC<br>23 days                                                         | Reduced food intake<br>Reduced body weight and adipose tissue<br>Leptin, cholesterol, and insulin ↓                                                                                               | [94]      |
| <b>Göttingen minipigs</b> ♀<br>NS<br><i>ad libitum</i> fed half a year | 30 mg/pig at day 0, SC<br>10 mg/pig every other day<br>58 days                                          | Reduced food intake<br>Reduced body weight                                                                                                                                                        |           |
| <b>C57BL/6 mice</b> ♂<br>HFD: from 10th week, 10 weeks                 | <b>α-MSH</b><br>150 µg/kg, IP<br>14 days                                                                | Reduced body weight and ingWAT<br><i>Ucp1</i> mRNA ↑<br><i>Pgc-1α</i> mRNA ↑<br>Thermoregulatory-related genes ↑                                                                                  | [95]      |
| <b>C57BL/J DIO mice</b> ♂<br>HFD: NS                                   | <b>BIM-22493</b><br>300 nmol/kg/day, SC osmotic pump<br>14 days                                         | Reduced food intake<br>Reduced body weight<br>Leptin, cholesterol, and insulin ↓                                                                                                                  | [96]      |
| <b>MC3R KO mice</b> ♀<br>STD: NS                                       | <b>BIM-22511</b><br>100 nmol/kg/day, SC osmotic pump<br>14 days                                         | Improved liver steatosis<br>Reduced body weight                                                                                                                                                   |           |
| <b>MC4R KO mice</b> ♀<br>STD: NS                                       | <b>BIM-22511</b><br>100 nmol/kg/day, SC osmotic pump<br>14 days                                         | No reduction of body weight<br>Insulin ↓                                                                                                                                                          |           |
| <b>CART peptide</b>                                                    |                                                                                                         |                                                                                                                                                                                                   |           |
| <b>Long-Evans rats</b> ♂<br>NS                                         | <b>CARTp [55–102]</b><br>9 µg/day, ICV<br>6 days                                                        | Reduced food intake<br>Reduced body weight<br>Leptin, insulin, glucose ↓                                                                                                                          | [141]     |
| <b>Sprague-Dawley rats</b> ♂<br>HFD: NS, 3 weeks                       | <b>CARTp [55–102]</b><br>500 pmol/each<br>two ICV injections                                            | Reduced food intake<br>Lipid metabolism ↑<br>NEFA ↑                                                                                                                                               | [142]     |
| <b>PrRP</b>                                                            |                                                                                                         |                                                                                                                                                                                                   |           |
| <b>C57BL/6 mice</b> ♂<br>HFD: from 8th week, 12 weeks                  | <b>Palm-PrRP31 or Myr-PrRP20</b><br>5 mg/kg, SC<br>twice a day<br>14 days                               | Reduced food intake<br>Reduced body weight<br>Reduced amount of WAT<br>Leptin ↓, Insulin (only palm-PrRP31) ↓<br><i>Fasn</i> mRNA ↓                                                               | [177]     |
| <b>C57BL/6 mice</b> ♂<br>HFD: from 8th week, 12 weeks                  | <b>Palm<sup>11</sup>-PrRP31</b><br>5 mg/kg, SC<br>twice a day<br>2 weeks                                | Reduced food intake<br>Reduced body weight<br>Reduced amount of scWAT<br>Insulin, Leptin, TAG, FFA, cholesterol ↓<br><i>Fasn</i> mRNA in WAT ↓<br><i>Ucp1</i> mRNA in BAT ↑                       | [179]     |
| <b>C57BL/6 mice</b> ♂<br>HFD: from 8th week, 12 weeks                  | <b>Palm<sup>11</sup>-PrRP31</b><br>5 mg/kg, SC<br>twice a day<br>28 days, or 14 days + 14 days wash-out | Reduced food intake of both groups<br>Reduced body weight of both groups<br>Reduced amount of scWAT<br>Leptin ↓<br>pAkt Ser473, p-ERK, PI3K in the<br>hypothalamus ↑<br><i>Ucp1</i> mRNA in BAT ↑ | [180]     |
| <b>Wistar Kyoto rats</b> ♂<br>HFD: from 8th week, 15 weeks             | <b>Palm<sup>11</sup>-PrRP31</b><br>5 mg/kg, IP<br>once a day<br>21 days                                 | Reduced body weight<br>Reduced amount of WAT<br>Improved OGTT<br><i>Acaca</i> mRNA, <i>Fasn</i> mRNA in scWAT ↓                                                                                   | [181]     |
| <b>Sprague-Dawley rats</b> ♂<br>HFD: from 7th to 9th week, 24<br>weeks | <b>Palm-PrRP31</b><br>1 or 5 mg/kg, IP<br>once a day<br>15 days                                         | Reduced food intake<br>Reduced body weight                                                                                                                                                        | [182]     |
| <b>Wistar Kyoto rats</b> ♂<br>HFD: from 8th week, 52 weeks             | <b>Palm<sup>11</sup>-PrRP31</b><br>5 mg/kg, IP<br>once a day 5 days/week<br>6 weeks                     | Reduced food intake<br>Reduced body weight<br>Improved OGTT<br>Leptin ↓                                                                                                                           | [183]     |

Continued over

**Table 1 Effect on food intake and body weight after chronic administration of neuropeptides or their modified analogs in DIO rodent models (Continued)**

| Animal model<br>HFD: starting age and weeks<br>of feeding | Intervention<br>Compound/ dose/ injection/ duration                                                                                                            | Effects<br>Increased ↑<br>Decreased ↓                                                                                                                    | Reference |
|-----------------------------------------------------------|----------------------------------------------------------------------------------------------------------------------------------------------------------------|----------------------------------------------------------------------------------------------------------------------------------------------------------|-----------|
| <b>DIO mice</b> ♂<br>HFD: from 6th week, 18 weeks         | <b>18-S4</b> (analog of PrRP31, agonist of GPR10 receptor)<br>0.5 mg/kg, SC<br>12 days                                                                         | Reduced body weight                                                                                                                                      | [185]     |
| <b>C57BL/6 J mice</b> ♂<br>HFD: 5th week, 47 weeks        | <b>GUB03385</b><br>1.250 nmol/kg, SC<br>7 days + 7 days wash-out                                                                                               | Reduced food intake<br>Reduced body weight                                                                                                               | [187]     |
| <b>C57BL/6 mice</b> ♂<br>HFD: from 8th week, 12 weeks     | <b>NPFF</b><br>4 nmol/kg, IP<br>18 days                                                                                                                        | No decreased body weight<br>No decreased food intake<br>No decreased weight of AT<br>glucose tolerance, AT insulin sensitivity ↑<br>mRNA <i>Npffr2</i> ↑ | [216]     |
| <b>C57BL/6N mice</b> ♂<br>HFD: from 8th week, 4 months    | <b>oct-1DMe</b><br>10 mg/kg, SC<br>28 days                                                                                                                     | No decreased body weight<br>No decreased food intake                                                                                                     | [217]     |
| <b>CD1 mice</b> ♀<br>NS                                   | <b>TRH</b><br><b>Synthetic TRH</b><br><b>(5-Oxo-L-prolyl-L-histidyl-L-prolinamide monotartrate monohydrate)</b><br>0.3 mg/kg, IP<br>26 days + 30 days wash-out | Reduced food intake<br>Reduced body weight, however, increased body weight during wash-out period<br>Leptin, cholesterol, TAG ↓                          | [262]     |

Abbreviations: *Acaca*, acetyl-CoA carboxylase; AT, adipose tissue; BAT, brown adipose tissue; CART, cocaine- and amphetamine-regulated transcript; DIO, diet-induced obesity; ERK, extracellular signal-regulated kinase; *Fasn*, fatty acid synthase; FFA, free fatty acids; HFD, high-fat diet; ICV, intracerebroventricular; ing, inguinal; IP, intraperitoneal; MCR, melanocortin receptor; MSH, melanocyte-stimulating hormone; myr, myristoyl; NS, not specified; *Npffr2*, neuropeptide FF receptor 2; oct, octanoyl; OGTT, oral glucose tolerance test; palm, palmitoyl; *Pgc-1α*, peroxisome proliferator-activated receptor-γ coactivator; PI3K, phosphoinositide 3-kinases; PrRP, prolactin-releasing peptide; SC, subcutaneous; TAG, triacylglycerols; TRH, thyrotropin-releasing hormone; Ucp1, uncoupling protein 1; WAT, white adipose tissue; ♂, male; ♀, female

lateral cerebral ventricle of DIO rats resulted in a decrease in food intake and body weight loss [141]. In addition to the reduced food intake, the ICV injection of DIO rats with CARTp [55–102] showed enhanced lipid metabolism, as indicated by increased plasma levels of nonesterified fatty acids, suggesting the hydrolysis of stored triglycerides [142].

The first indications of the potential neuroprotective effects of CARTp were described in 2011, when ICV injection of CARTp for four consecutive days in rats resulted in significantly improved spatial learning and memory in the MWM test [143]. Furthermore, immunohistochemical data have shown significantly increased CART-immunoreactivity in brain areas involved in learning and memory in rats after four days of training in the MWM test [143]. The neuroprotective effects of CARTp on the pathology of AD were studied by Xu et al. They observed Aβ plaque-associated CART immunoreactivity in the hippocampus and cortex of 8-month-old APP/PS1 mice as well as in the cortex of human AD patients [144]. Chronic CARTp treatment attenuated memory deficits in APP/PS1 mice and improved synaptic ultrastructure and long-term potentiation of neurons. Additionally, it reduced reactive oxygen species but did not have an impact on the reduction in Aβ [144]. A subsequent study showed significantly decreased levels of soluble Aβ<sub>1-40</sub> and Aβ<sub>1-42</sub> in the hippocampus of APP/PS1 mice after CARTp treatment [145]. The number of Aβ plaques was reduced due to activation of Aβ-degrading enzymes such as neprilysin, insulin-degrading enzyme, and low-density lipoprotein receptor-related protein 1 [146]. Moreover, CARTp reduced levels of reactive oxygen species in the hippocampus of APP/PS1 [146]. Similar results were observed in rats injected intrahippocampally with Aβ<sub>1-42</sub>; Aβ induced a reduction in CART-immunoreactive fibers, but this was prevented by 5-day pretreatment with CARTp injected to the hippocampus [147]. CARTp further improved spatial memory in MWM, decreased oxidative stress and attenuated neuronal apoptosis [147].

Taken together, these findings suggest that CARTp could be used as an antiobesity or neuroprotective drug in the treatment of neurodegenerative diseases. Its beneficial effects on mouse models of obesity and AD-like pathology are summarized in Tables 1 and 2. However, understanding the exact mechanism of action of CARTp in models of obesity and neurodegeneration is necessary, and discovering of the CARTp receptor is essential for this purpose.



**Table 2 Pharmacological interventions of neuropeptides in rodent models of AD-like pathology**

| Animal model<br>Starting age                                                                     | Intervention<br>Compound/dose/<br>injection/duration                               | Effect of<br>memory/Behavioral<br>test                                                | Effect in<br>hippocampus/cortex                                                                                 | Marker<br>Increased ↑<br>Decreased ↓                                                                                         | Reference |
|--------------------------------------------------------------------------------------------------|------------------------------------------------------------------------------------|---------------------------------------------------------------------------------------|-----------------------------------------------------------------------------------------------------------------|------------------------------------------------------------------------------------------------------------------------------|-----------|
| <b>Melanocortins</b>                                                                             |                                                                                    |                                                                                       |                                                                                                                 |                                                                                                                              |           |
| <b>TgCRND8</b> ♂, ♀<br>20 weeks old                                                              | <b>α-MSH</b><br>0.5 mg/kg IP daily<br>28 days                                      | OF: normal anxiety, no<br>effect on locomotion<br>Y maze: preserved spatial<br>memory | Increased synaptic<br>plasticity                                                                                | GAD67 ↑                                                                                                                      | [100]     |
| <b>Sprague-Dawley rats</b> ♂<br>Transient global cerebral<br>ischemia<br>NS age                  | <b>α-MSH</b><br>0.5 mg/kg IP<br>30 min post-ischemia, and<br>at 24, 48, 72, 96 h   |                                                                                       | Viable neurons in the CA1<br>pyramidal cell layer<br>Higher number of viable<br>neurons                         | GFAP-labeled cells ↓ intensity                                                                                               | [101]     |
| <b>Mongolian gerbils</b> ♂<br>Transient global brain<br>ischemia<br>NS age                       | <b>NDP-α-MSH</b><br>340 µg/kg IP<br>2 × daily<br>11 days                           | MWM: improved learning<br>and memory                                                  | Prevents DNA<br>fragmentation in the<br>hippocampal cells                                                       | BrdU-labeled cells ↑<br>BrdU-NeuN+ ↑<br>Zif268 ↑                                                                             | [102]     |
| <b>3xTg mice</b> ♂<br>12 weeks old                                                               | <b>NDP-α-MSH</b><br>340 µg/kg IP daily<br>18 weeks<br>+/- inhibitor HS024          | MWM: improved learning<br>and memory                                                  | Decreased Aβ pathology<br>Reduced Tau<br>phosphorylation<br>Decreased apoptosis<br>Reduced<br>neuroinflammation | Aβ plaques ↓, p-APP Thr668<br>↓<br>p-Tau Thr181, p-Tau Ser396,<br>p-Tau Ser202 ↓<br>p-p38 ↓, Caspase-3 ↓<br>IL-1β ↓, TNF-α ↓ | [103]     |
| <b>5XFAD mice</b> NS sex<br>5 and 7 months old<br><b>3xTg mice</b> ♂<br>9 and 12 months old      | <b>NDP-α-MSH</b><br>340 mg/kg IP daily<br>50 days                                  | MWM: improved spatial<br>memory                                                       | Microglial reactivity<br>Reduced AD-related<br>markers                                                          | Iba1 ↓ in 3xTg mice<br>p-Tau Ser396, p-Tau Ser202,<br>p38 MAPK ↓ in 5XFAD<br>p-Tau Ser202, p38 MAPK ↓<br>in 3xTg             | [104]     |
| <b>Tg2576</b> ♂<br>24 weeks old                                                                  | <b>NDP-α-MSH</b><br>340 µg/kg IP daily<br>50 days                                  | MWM: improved spatial<br>learning and memory                                          | Decreased Aβ pathology<br>Increased synaptic<br>plasticity                                                      | Aβ plaques ↓<br>Zif268 ↑                                                                                                     | [105]     |
| <b>Tg2576 mice</b> ♂<br>24 weeks old                                                             | <b>NDP-α-MSH</b><br>340 µg/kg IP daily<br>50 days                                  | MWM: improves learning<br>and memory                                                  | Decreased Aβ pathology<br>Increased neurogenesis<br>Reduced<br>neuroinflammation                                | Aβ plaques ↓<br>BrdU+ ↑, Zif268 ↑, NeuN ↑<br>GFAP ↓                                                                          | [106]     |
| <b>APP/PS1 mice</b> ♂<br>6–7 months old                                                          | <b>D-Tyr MTII</b><br>ICV Alzet minipumps<br>2.4 nmol/day<br>28 days                |                                                                                       | Decreased Aβ pathology<br>Reduced<br>neuroinflammation<br>Increased synaptic<br>plasticity                      | Aβ plaques ↓<br>IL-1β ↓, Icam1 ↓<br>Gfap ↓, Aif1 ↓<br>C3+ GFAP+ astrocytes ↓                                                 | [108]     |
| <b>CART peptide</b>                                                                              |                                                                                    |                                                                                       |                                                                                                                 |                                                                                                                              |           |
| <b>Sprague-Dawley rats</b> ♂<br>NS age                                                           | <b>CARTp [54–102]</b><br>25–100ng/rat/day<br>4 days<br>CART antibody<br>ICV daily  | MWM: improved spatial<br>memory                                                       | Increased<br>CART-immunoreactive<br>fibers in the hippocampus                                                   | CART-ir fibers ↑                                                                                                             | [143]     |
| <b>APP/PS1 mice</b> ♂<br>8 months old                                                            | <b>CART peptide</b><br>IV 0.5 µg/kg 10 days<br>+ IP 0.5 µg/kg 20 days              | MWM: improved spatial<br>memory                                                       | Decreased Aβ pathology<br>Increased synaptic<br>plasticity<br>Reduced reactive oxygen<br>species                | Aβ plaques ↓<br>LTP ↑, SYP ↑<br>ROS ↓                                                                                        | [144]     |
| <b>APP/PS1 mice</b> ♂<br>6 months old                                                            | <b>CART peptide</b><br>IV 0.5 µg/kg 10 days<br>+ IP 0.5 µg/kg 20 days              | MWM: improved spatial<br>memory                                                       | Decreased Aβ pathology<br>Increased insulin signaling                                                           | Soluble Aβ ↓, Aβ enzymes ↓<br>Akt ↑                                                                                          | [145]     |
| <b>APP/PS1 mice</b> ♂<br>8 months old                                                            | <b>CART peptide</b><br>IV 0.5 µg/kg 10 days<br>+ IP 0.5 µg/kg 20 days              | MWM: improved spatial<br>memory                                                       | Decreased Aβ pathology<br>Activation of<br>Aβ-degrading enzymes<br>Decreased reactive<br>oxygen species         | Aβ plaques ↓<br>NEP, IDE ↑<br>ROS level ↓                                                                                    | [146]     |
| <b>Sprague-Dawley rats</b> ♂<br>Intrahippocampally<br>injected with Aβ <sub>1-42</sub><br>NS age | <b>CART [55–102]</b><br>Intrahippocampal injection<br>0.02 µg/hemisphere<br>5 days | MWM: improved spatial<br>memory<br>OF: improved locomotor<br>activity                 | Decreased Aβ pathology<br>Attenuated oxidative<br>stress<br>Decreased neuronal<br>apoptosis                     | Aβ plaques, BACE1 ↓<br>MDA ↓<br>T-SOD, GSH, ATP, Nrf2,<br>HO-1, NQO1 ↑<br>Bcl-2 ↑<br>Bax, caspase 3, caspase 9 ↑             | [147]     |
| <b>PACAP</b>                                                                                     |                                                                                    |                                                                                       |                                                                                                                 |                                                                                                                              |           |

Continued over

Downloaded from <http://portlandpress.com/bioscierep/article-pdf/44/4/BSR20231385/956105/bsr-2023-1385c.pdf> by guest on 25 April 2024

**Table 2 Pharmacological interventions of neuropeptides in rodent models of AD-like pathology (Continued)**

| Animal model<br>Starting age                                              | Intervention<br>Compound/dose/<br>injection/duration                                                            | Effect of<br>memory/Behavioral<br>test                                  | Effect in<br>hippocampus/cortex                                                                                                                                                                                                                                                                   | Marker<br>Increased ↑<br>Decreased ↓                                                                                                        | Reference     |
|---------------------------------------------------------------------------|-----------------------------------------------------------------------------------------------------------------|-------------------------------------------------------------------------|---------------------------------------------------------------------------------------------------------------------------------------------------------------------------------------------------------------------------------------------------------------------------------------------------|---------------------------------------------------------------------------------------------------------------------------------------------|---------------|
| <b>APP(V717I) mice</b> ♂<br>3 months old                                  | <b>PACAP38</b><br>IN 10 µg/day<br>5 days/week<br>3 months                                                       | NOR: improved memory                                                    | Increased nonamyloidogenic pathway of APP<br>Increased expression of BDNF                                                                                                                                                                                                                         | Neuroprotective sAPPα ↑<br>soluble Aβ ↓<br>BDNF ↑                                                                                           | [158]         |
| <b>MSG mice</b> ♂<br>6 months old                                         | <b>PrRP</b><br><b>Palm-PrRP31</b><br>SC 5 mg/kg<br>Liraglutide SC 0.2 mg/kg<br>Daily, 14 days                   |                                                                         | Reduced Tau phosphorylation<br>Increased insulin signaling                                                                                                                                                                                                                                        | p-GSK3β(Ser9) ↑<br>p-Tau Ser396 ↓, p-Tau Thr231 ↓, p-Tau Thr212 ↓<br>p-PDK1(Ser241) ↑<br>p-Akt (Thr308), (Ser473) ↑                         | [188]         |
| <b>Thy-Tau22 mice</b> ♀<br>7 months old                                   | <b>Palm<sup>11</sup>-PrRP31</b><br>Alzet minipumps SC<br>5 mg/kg/day<br>2 months                                | Y maze: improved short-term working memory                              | Reduced Tau phosphorylation<br>Increased synaptic plasticity<br>Increased insulin signaling                                                                                                                                                                                                       | p-GSK3β(Ser9) ↑, PP2A subC ↑<br>p-Tau Ser396 ↓, p-Tau Ser404 ↓, p-Tau Thr231 ↓<br>PSD-95 ↑, SYP ↑<br>p-Akt (Ser473) ↑, p-Akt (Thr308) ↑     | [189]<br>[54] |
| <b>APP/PS1 mice</b> ♂<br>7 months old                                     | <b>Palm<sup>11</sup>-PrRP31</b><br>SC 5 mg/kg                                                                   |                                                                         | Decreased Aβ pathology                                                                                                                                                                                                                                                                            | Aβ plaques ↓                                                                                                                                | [190]         |
| <b>APP/PS1 mice</b> ♂<br>7 months old                                     | Liraglutide SC 0.2 mg/kg<br>Daily, 2 months<br><b>Palm<sup>11</sup>-PrRP31</b><br>SC 5 mg/kg<br>Daily, 2 months |                                                                         | Decreased neuroinflammation<br>Reduced Tau phosphorylation<br>Mild increase in neurogenesis<br>Increased synaptogenesis<br>Reduced Aβ in cerebellum<br>Reduced microgliosis in cerebellum<br>Decreased pro-inflammatory proteins in hippocampi<br>Increased synaptogenesis<br>Decreased apoptosis | lba-1 ↓, GFAP ↓<br>p-Thr231 ↓<br>DCX ↑<br>SYP ↑<br>Aβ plaques ↓<br>lba-1 ↓<br>CD68 ↓, IFNγ ↓<br>Syntaxin 1A ↑, SYP ↑, PSD95 ↑<br>Bax/Bcl2 ↓ |               |
| <b>Sprague-Dawley rats</b> ♂<br>NS age                                    | <b>NPFF</b><br><b>NPFF</b><br>VTA 1, 2.5, 5, 7.5 or 10 µg/mice                                                  | Cages: reduced locomotion                                               |                                                                                                                                                                                                                                                                                                   |                                                                                                                                             | [225]         |
| <b>Wild-type mice</b> (NS strain) ♂<br>3–4 months old                     | <b>NPFF</b><br>ICV 1.0 µg/mice<br>ICV 10 µg/mice                                                                | MWM: spatial acquisition improved<br>reduced                            |                                                                                                                                                                                                                                                                                                   |                                                                                                                                             | [226]         |
| <b>C57BL/6J mice</b> ♂<br>3 months old                                    | <b>1DMe</b><br>ICV 1 or 10 nmol                                                                                 | OL: impaired short-term memory<br>MWM: impaired long-term memory        |                                                                                                                                                                                                                                                                                                   |                                                                                                                                             | [227]         |
| <b>CFLP mice</b> ♂<br>NS age                                              | <b>NPAF</b><br>ICV 1.0 µg/mice<br><b>CRH</b>                                                                    | Improved passive avoidance learning                                     |                                                                                                                                                                                                                                                                                                   |                                                                                                                                             | [228]         |
| <b>APP/PS1 mice</b> ♂, ♀<br>1 month old                                   | <b>R121919 (CRH 1 receptor antagonist)</b><br>SC 20 mg/kg<br>150 days                                           | MWM: improved spatial memory                                            | Decreased Aβ plaque load<br>Decreased activity of BACE<br>Increased synaptogenesis                                                                                                                                                                                                                | Aβ plaques ↓<br>BACE ↓<br>SYP ↑, MAP2 ↑                                                                                                     | [244]         |
| <b>Tg2576 mice chronically stressed</b> ♂, ♀<br>4 months                  | <b>Antalarmin (CRH 1 receptor antagonist)</b><br>20 mg/kg in drinking water, 6 months                           | EPM: decreased anxiety-like behavior<br>Y-maze: improved working memory | Decreased level of Aβ in chronically stressed mice                                                                                                                                                                                                                                                | Aβ plaques ↓, Aβ <sub>42</sub> ↓                                                                                                            | [245]         |
| <b>PS19 mice</b> ♂, stressed for 1 month during the treatment<br>7 months | <b>NBI 27914 (CRH 1 receptor antagonist)</b><br>SC 10 mg/kg<br>6 day/week<br>4 weeks                            | Fear conditioning: improved impairment in fear-associated memory        | Attenuated Tau hyperphosphorylation<br>Prevented neuronal loss                                                                                                                                                                                                                                    | AT8 ↓, PHF1 ↓<br>NeuN ↑                                                                                                                     | [246]         |

Continued over

Downloaded from <http://portlandpress.com/bioscierep/article-pdf/44/4/BSR20231385/956105/bsr-2023-1385c.pdf> by guest on 25 April 2024

**Table 2 Pharmacological interventions of neuropeptides in rodent models of AD-like pathology (Continued)**

| Animal model<br>Starting age                                                         | Intervention<br>Compound/dose/<br>injection/duration                | Effect of<br>memory/Behavioral<br>test                                           | Effect in<br>hippocampus/cortex                                    | Marker<br>Increased ↑<br>Decreased ↓  | Reference |
|--------------------------------------------------------------------------------------|---------------------------------------------------------------------|----------------------------------------------------------------------------------|--------------------------------------------------------------------|---------------------------------------|-----------|
| Sprague-Dawley rats ♂,<br>♀ exposed to<br>isolation-restraint<br>stress<br>18 months | R121919 or antalarmin<br>20 mg/kg mixed in chow<br>diet<br>3 months | OF: decreased anxiety<br>NOR: improved memory<br>MWM: improved spatial<br>memory | Increased spine density in<br>cortex<br>Increased synaptic density | Spine density ↑<br>Synaptic density ↑ | [247]     |

Abbreviations: 1DMe, stable analog of neuropeptide; A $\beta$ , amyloid  $\beta$ ; Aif, allograft inflammatory factor 1; APP, amyloid precursor protein; AT8, antibody pTau Ser202&Thr205; BACE1,  $\beta$ -site APP cleaving enzyme 1; Bax, proapoptotic protein; Bcl-2, antiapoptotic protein; BDNF, brain-derived neurotrophic factor; BrdU+, bromouridine positive neurons; CART, cocaine- and amphetamine-regulated transcript; CD68, a scavenger receptor extensively increased in highly reactive microglia; CDK-5, cyclin dependent kinase 5; CRH, corticotropin-releasing hormone; DCX, doublecortin; EPM, elevated plus maze; FF, 3xTg triple transgenic mice; GAD67, glutamic acid decarboxylase 67; GFAP, glial fibrillary acidic protein; GSH, glutathione; GSK-3 $\beta$ , glycogen synthase kinase 3 $\beta$  (pSer9: inhibition, pTyr216: activation); HFD, high-fat diet; HO-1, heme oxygenase-1; Iba1, ionized calcium-binding adaptor molecule 1; Icam1, intercellular adhesion molecule 1; ICV, intracerebroventricular; IDE, insulin-degrading enzyme; IFN $\gamma$ , interferon  $\gamma$ ; IL, interleukin; IN, intranasal; IP, intraperitoneal; IV, intravenous; LTP, long-term potentiation; MAP2, microtubule-associated protein 2; MAPK, mitogen-activated protein kinase; MDA, malondialdehyde; MSG, monosodium glutamate; MSH, melanocyte-stimulating hormone; MWM, Morris water maze; NEP, neprilysin; NeuN neuronal nucleus, marker of mature neurons; NOR, novel object recognition test; NPAF, neuropeptide AF; NPFF, neuropeptide FF; NQO1, NADPH quinone oxidoreductase 1; Nrf2, Nuclear erythroid-2-related factor 2; NS, not specified; OF, open field; OL, object location; PACAP, pituitary adenylate cyclase-activating peptide; PDK1, phosphoinositide-dependent kinase 1; PHF1, antibody pTau Ser396&Ser404; PS1, presenilin 1; PP2A, subC protein phosphatase 2A subunit C; palm, palmitoylated; PrRP, prolactin-releasing peptide; PSD95, postsynaptic density protein 95; ROS, reactive oxygen species; SC, subcutaneous; SYP, synaptophysin; T-SOD, superoxide dismutase; VTA, ventral tegmental area; Zif268, immediate early response gene; ♂, male; ♀, female.

## Pituitary adenylate cyclase-activating peptide (PACAP)

PACAP is a 38-amino-acid or 27-amino-acid neuropeptide produced and released both in the periphery and the CNS, especially in the VMN, or in the LHA and PVN in the hypothalamus [148–150]. PACAP binds to three GPCRs: PAC1R, VPAC1, and VPAC2 [151]. Its metabolic pathways are linked to the regulation of body weight and the development of obesity and metabolic syndrome. In addition to appetite regulation, PACAP also increased thermogenesis in mice [22,23]. The importance of PACAP is stressed by its involvement in the leptin-induced decrease in food intake and increased thermogenesis as a marker of increased energy expenditure [152]. Moreover, PACAP stimulates POMC neurons in the ARC but inhibits NPY/AgRP [153]. A study of PACAP-null mice revealed decreased survival of newborn mice when the mice were housed at room temperature. Moreover, these mice had decreased body weight compared to that of their wild-type littermates due to a decreased amount of WAT [154]. Even though PACAP is involved in the regulation of energy homeostasis and could be considered a possible target for obesity treatment, the direct antiobesity effects of PACAP have still not been well explored [155].

High expression of PACAP was detected in the hippocampus, particularly in the dentate gyrus (DG), where increased synaptic transmission was observed after PACAP treatment [156]. This finding highlights the possible neuroprotective effects of PACAP in the treatment of dementia. Postmortem analysis of brains from patients with AD revealed a negative correlation between the level of A $\beta$  plaques and PACAP, and between the level of PACAP and tau pathology (according to Braak stages of AD severity) [157]. As summarized in Table 2, 3-month-long intranasal application of PACAP to APP(V717I) mice harboring the London mutation improved short-term memory in the novel object recognition test, decreased the level of soluble A $\beta$ , and increased the levels of neurotrophin BDNF [158].

## Prolactin-releasing peptide (PrRP)

PrRP is a hypothalamic neuropeptide with a misleading name [159]. Shortly after its discovery, the initially described stimulation of prolactin was questioned; nevertheless, the name remained [160,161]. In organism, two equally active isoforms can be found: PrRP31 with 31 amino acids, or its shorter analog PrRP20 with an identical C-terminal sequence. The last two amino acids at the C-terminus, Arg-Phe-amide, are important for preserving the binding affinity of PrRP to its receptor and proper biological activity [159,162–164]. PrRP was identified as a ligand of GPR10 (also known as hGR3 or UHR1) [159]. It displayed high affinity for the receptor type 2 for neuropeptide FF (NPFFR2), which is another neuropeptide from the RF-amide family [165]. Studies investigating the distribution of PrRP or its receptor in the organism revealed high expression of PrRP in centers implicated in food intake regulation, such as the hypothalamus (DMN, VMH, or PVN) or in the NTS in the brainstem [24,166–169]. Subsequent studies confirmed that ICV injection of PrRP significantly reduced food intake in free-fed rats and decreased body weight [24,164,170].

The weight loss observed was greater than that corresponding to a reduction in food intake alone, suggesting that increased energy expenditure also contributes to the weight loss induced by PrRP administration [171]. The importance of PrRP in food intake regulation and energy balance is emphasized by the fact that PrRP expression is directly stimulated by leptin, the main regulator of energy homeostasis [172]. PrRP also mediates the anorexigenic effect of peripheral anorexigenic CCK [173]. Moreover, PrRP-deficient [174] or GPR10-deficient [175,176] mice develop late-onset obesity and decreased energy expenditure.

The peripheral injection of natural PrRP31, a convenient route for potential anti-obesity treatment, does not decrease food intake in fasted mice [177]. Thus, a series of PrRP20 or PrRP31 lipidized with fatty acids of different lengths (from octanoyl to stearyl [stear]) at the N-terminus were designed. Lipidization did not influence binding to the GPR10 receptor; moreover, these analogs exhibited increased affinity for NPFFR2 [177]. Only myr-PrRP20, myr-PrRP31, palm-PrRP31 and stear-PrRP31 significantly reduced food intake in overnight fasted mice after acute subcutaneous (SC) application [177]. In free-fed rats, palm-PrRP31 administered for three consecutive days significantly reduced food intake after SC or intraperitoneal (IP) injection at a dose of 5 mg/kg. A comparable effect was observed after intravenous (IV) administration even at a dose of 0.1 mg/kg [178]. Finally, myr-PrRP20 or palm-PrRP31 was chronically SC injected into DIO mice for 2 weeks; this treatment resulted in significant weight loss and improved metabolic parameters related to obesity, such as decreased leptin or insulin levels [177]. A comprehensive study of different lipidized analogs of PrRP31 performed by Pražienková et al. [179] defined an analog of PrRP31 palmitoylated at position 11 (where arginine is substituted with lysine) through a  $\gamma$ -glutamic acid linker (palm<sup>11</sup>-PrRP31) as an analog with improved bioavailability. Two-week-long treatment of DIO mice significantly reduced body weight, improved metabolic parameters, and decreased *de novo* lipogenesis. Both analogs also increased the expression of uncoupling protein 1 in brown adipose tissue (BAT), suggesting increased energy expenditure in these mice [177,179]. A subsequent study of chronic SC administration of palm<sup>11</sup>-PrRP31 investigated the possible yo-yo effect after termination of the treatment [180]. One group of DIO mice was SC injected for 28 days with palm<sup>11</sup>-PrRP, while the second group received palm<sup>11</sup>-PrRP31 for 14 days and then saline for the subsequent 14 days. As expected, 28 days of treatment significantly reduced the body weight of the mice. A comparable body-weight reduction was observed in the palm<sup>11</sup>-PrRP31-saline group after 2 weeks of treatment. Interestingly, there was no body weight gain within the subsequent 2 weeks of saline administration [180]. Similar trends toward a reduction in food intake, decreased body weight, and improvements in metabolic parameters, such as decreased levels of glucose, leptin, or insulin, were observed in several rat DIO models [181–183]. The effects of palmitoylated-PrRP31 analogs in different models of obesity were reviewed by Mrázíková et al. [184]. Another series of modified PrRP analogs with multiple ethylene glycol-fatty acid (MEG-FA) stapling platform was described by Pflimlin et al. [185]. The lead compound 18-S4, a selective agonist of GPR10, showed improved bioavailability and stability in serum. Twelve-day-long SC treatment of DIO mice resulted in a significant decrease in body weight [185]. On the other hand, several studies have described the importance of dual agonism toward GPR10 and NPFFR2 for the full antiobesity effect of lipidized PrRP31 analogs [177,179,186,187]. Alexopoulou et al. designed different series of lipidized PrRP analogs with selectivity for either GPR10 or both GPR10 and NPFFR2. Only analogs with dual agonist effect had potent antiobesity effects. Moreover, body weight did not increase after termination of treatment [187].

Palm-PrRP31 also significantly decreased the body weight of mice with obesity induced by monosodium glutamate (MSG), which is repeatedly SC injected to newborn mice [188]. In addition to obesity, MSG-obese mice with pre-diabetes, leptin and insulin resistance exhibited central insulin resistance leading to increased hippocampal Tau hyperphosphorylation. This effect was attenuated by palm-PrRP31 treatment through the activation of the central insulin signaling cascade and inhibition of glycogen-synthase kinase 3 $\beta$  (GSK-3 $\beta$ ), the main kinase of the Tau protein [188]. The effect of palm<sup>11</sup>-PrRP31 on the attenuation of Tau hyperphosphorylation was further observed in Thy-Tau22 mice overexpressing mutated human Tau with accelerated hyperphosphorylation [189]. One month of SC infusion of palm<sup>11</sup>-PrRP31 attenuated Tau hyperphosphorylation at different epitopes in the hippocampus, increased the expression of markers of synaptic plasticity, and improved spatial working memory in the Y-maze test [189]. Potential neuroprotective effects of palm<sup>11</sup>-PrRP31 were also demonstrated in APP/PS1 mice, in which 2 months of treatment significantly decreased the number of A $\beta$  plaques in the hippocampus, cortex [54], and cerebellum [190]. Tau phosphorylation at different epitopes was also attenuated after palm<sup>11</sup>-PrRP31 treatment in the hippocampus [54]. A $\beta$  plaques colocalize with microgliosis and astrocytosis, whose levels also decrease after treatment with palm<sup>11</sup>-PrRP31 [54,190]. Further analysis revealed changes in the distribution of various lipids, mainly gangliosides (GM2 36:1, GM3 36:1) and phosphatidylinositols (PI 38:4, 36:4), around A $\beta$  plaques; moreover, the lipid profile normalized after treatment with palm<sup>11</sup>-PrRP31 [191]. Moreover, palm<sup>11</sup>-PrRP31 increased synaptic plasticity [54,190], neurogenesis manifested as an increase in doublecortin-positive cells in the hippocampal DG [54], and decreased apoptosis in the hippocampus [190]. Recently, a beneficial effect on adult neurogenesis, which was impaired in DIO

mice, was described [192]. The possible implication of PrRP and GPR10 for proper brain function was stressed by the recent finding that decreased GPR10 receptor levels were observed in patients with AD [193].

Studies in mouse models of obesity (summarized in Table 1) or mouse models of amyloidosis or tauopathy (summarized in Table 2) have shown promising potential antiobesity and neuroprotective properties of palmitoylated PrRP31 analogs.

## Neuropeptide FF (NPFF)

The octapeptide NPFF and the octadecapeptide neuropeptide AF (NPAF) were first isolated from bovine brain tissue in 1985 [194]. In rodents, NPFF was found to be highly expressed in the brainstem in the NTS, dorsal horn of the spinal cord, and hypothalamus between the DMN and VMN, with neuronal projections to the PVN [195–198]. Autoradiographic studies have shown that NPFF receptors are present in memory-related brain regions, such as the amygdala, hippocampus, bed nucleus of the stria terminalis, and cortical regions [199,200].

The function of NPFF is associated with two types of GPCRs—NPFFR1 and the NPFFR2 receptor [200]. The presence of the NPFFR1 and NPFFR2 mRNAs in the medulla, lateral hypothalamus, and thalamus indicates that NPFF participates in the regulation of responses to painful stimuli [200,201]. ICV administration of NPFF to mice reduced the analgesic effects of morphine and lowered the pain threshold, indicating that NPFF likely has anti-opioid effects. This is further supported by the fact that ICV administration of the anti-NPFF antiserum increased opiate-induced analgesia and restored sensitivity to morphine in mice that had already developed tolerance to its analgesic effects [202]. NPFF was found to be physiologically more active than NPAF in decreasing tail-flick latency in rats and it also attenuated the prolongation of tail-flick latency induced by morphine [194].

Multiple NPFF agonists and antagonists resistant to peptidases, which cause rapid inactivation of NPFF, were synthesized and tested. The analog 1DMe ([D-Tyr<sup>1</sup>, (N-Me)-Phe<sup>4</sup>] NPFF) has an affinity comparable to that of NPFF [203] and has been shown to inhibit morphine-induced analgesia in mice [204]. Several candidates for NPFF receptor agonists and antagonists have been synthesized, but no antagonist has demonstrated high selectivity and activity [205]. Centrally administered RF9, a reported NPFF receptors antagonist, was found to block hyperalgesia after prolonged administration of opioids [206] and antagonize the hypothermic effects induced by the selective agonists of NPFFR1 and NPFFR2 in mice [207]. However, RF9 did not reverse the anorectic effect of the agonist [Tyr<sup>1</sup>]NPFF, and its biological effects appear to be more agonistic than antagonistic [208].

Since many opioid agonists have been shown to increase food intake, NPFF was also investigated in this context. ICV administration of NPFF rapidly reduced food intake in dose-dependent manner in fasted rats [209,210]. This anorexigenic effect was initially attributed to increased water intake [210]; however, in other studies, this dipsogenic effect was no longer reported [211]. The regulation of feeding is likely through modulation of hypothalamic neurons [212]. Furthermore, both the central administration of NPFF [213] or NPAF [214] reduced food intake in fasted chicks. The centrally injected agonist [Tyr<sup>1</sup>]NPFF significantly lowered food intake in fasted mice [215]. Interestingly, ICV administration of NPFF caused a significant decrease in food intake in both wild-type mice and mice lacking GPR10 receptor. The ability of NPFF to reduce food intake in the GPR10 KO mice suggests that NPFFR2 expression is maintained in these animals [173]. NPFF was reported to promote the activation of adipose tissue macrophages (ATMs), which have an impact on the development of obesity-induced metabolic diseases, to an alternative M2 activation state, which is metabolically beneficial and is activated in lean adipose tissue. In ATMs, NPFFR2 is expressed in both humans and mice. Plasma levels of NPFF are decreased in obese patients and mice on a HFD and restored after caloric restriction. In this study, HFD-fed mice treated IP with NPFF did not decrease body weight, food intake, or the weight of adipose tissue [216]. In our recent study, involving lipidized NPFF and NPAF analogs, we observed only a slight anorexigenic effect on fasted lean mice following the SC administration of octanoylated-1DMe analog. In mice fed a HFD, long-term treatment did not result in reduced food intake or body weight [217]. Alongside its anorexigenic effect, NPFF was implicated in blood pressure regulation [218,219] as well as body temperature [220,221].

Multiple experiments suggest a role for NPFF in cognitive functions due to its opioid-modulating properties, as the endogenous opioid system is involved in the modulation of behavior. A single ICV injection of NPFF reduced the expression of morphine-induced sensitization in rats with a conditioned place preference [222], as did the rewarding effects of cocaine or amphetamine [223,224]. NPFF also inhibited hyperlocomotor activity of cocaine-induced sensitization in mice [223]. RF9 reversed the inhibitory effect of NPFF but did not affect amphetamine- or saline-conditioned rats [224].

Injection of NPFF in the ventral tegmental area reduced the increase in locomotor activity induced by novelty exposure [225]. Moreover, NPFF impairs spatial acquisition by significantly reducing spatial learning in the MWM [226]. 1DMe, injected via the ICV, induced delayed hyperlocomotion and mildly impaired both short-term and long-term

spatial memory without affecting contextual fear memory in mice [227]. Additionally, the NPAF has a stimulatory effect on memory consolidation in passive avoidance learning [228]. Serum NPAF levels are significantly elevated in patients with spinal cord injury [229], which is associated with cognitive impairment [230]. These data suggest that the NPAF may have prognostic value for predicting cognitive impairment in patients with spinal cord injury, as its peripheral levels are normally limited and could arise due to leakage from CNS tissues [231].

Taken together, these results demonstrate the small but complex influence of the NPAF system on mouse behavior and cognitive functions, as summarized in Table 2. However, only a limited number of studies have been conducted in this area, and further experiments need to be explored.

## Corticotropin-releasing hormone (CRH)

The hypothalamic CRH is an important physiological activator of POMC-derived hormones, such as ACTH and  $\beta$ -endorphins [232–234]. CRH consists of 41 amino acids, has an amidated C-terminus, is widely distributed in the CNS [235], for example, in the hypothalamus in the PVN with projections to the ME, in the cortex or in the hippocampus. CRH signals through two receptors, CRH-R1 and CRH-R2, both belonging to the GPCR family and widely distributed in both the CNS and the periphery [236].

CRH is considered an anorexigenic compound. However, its direct involvement in obesity treatment in preclinical models has not yet been proven. When administered via the ICV, CRH significantly decreased food intake in rats [237] and rhesus monkeys [238], after acute administration. Seven-day-long infusion of CRH resulted in significantly reduced food intake in rats followed by decreased body weight and increased thermogenesis in BAT [237].

Early dysregulation of the hypothalamic–pituitary–adrenal (HPA) axis or stress axis was observed in patients with sporadic AD, followed by increased secretion of glucocorticoids. Hormones of the HPA axis and their receptors are proposed to be involved in AD; therefore, they could be targets for treating neurodegenerative diseases (reviewed previously [239]). Intrahippocampal CRH administration to mice exposed to acute stress via the food shock test or via an environment with predator odor increased hippocampal long-term potentiation and strengthened synaptic plasticity. Thus, CRH could be implicated in stress-enhanced memory consolidation during stress conditions [240]. In patients with AD, a reduced level of CRH was observed [241], whereas the number of CRH receptors increased [242]. In AD brain tissues, reduced concentrations of CRF-like immunoreactivity are accompanied by a significant reciprocal increase in CRF receptor binding within affected cortical areas. This increase in CRH binding correlates significantly with the decreased levels of CRH [243].

Further research on this phenomenon revealed that in different mouse models of AD, for example, in APP/PS1 mice [244], Tg2576 mice [245], and PS19 mice, a model of tauopathy [246], antagonists of CRH receptor 1 (CRH-R1) improved memory deficits and decreased A $\beta$  and Tau hyperphosphorylation. Moreover, a CRH-R1 antagonist also prevents memory deficits and synaptic loss in 18-month-old rats with stress-induced memory deficits [247].

Hormones of the HPA axis and their receptors are proposed to be involved in AD; therefore, they could be targets for treating the neurodegenerative diseases reviewed previously [239], and are summarized in Table 2.

## Thyrotropin-releasing hormone (TRH)

The hypothalamic tripeptide TRH (pGlu-His-Pro-NH<sub>2</sub>) expressed in the PVN [248] is directly stimulated by leptin [249] or POMC-derived peptides [250], and inhibited by NPY/AgRP [251]. TRH is synthesized from a larger inactive precursor pro-TRH through a series of post-translational modifications [252]. This hormone exerts its effects through GPCR receptors, which are categorized as TRH-R1, TRH-R2, and TRH-R3. They exhibit species-specific variations; in humans, TRH-R1 is the unique type, while rodents express a second subtype, TRH-R2 and birds express TRH-R3 together with TRH-R1 [253].

TRH is known as the primary regulator of the hypothalamic-pituitary-thyroid axis, which is important for maintaining energy expenditure and body weight and is active even in states of leptin resistance associated with obesity [254]. Moreover, in a state of negative energy balance, the levels of TRH decrease [255,256]. Conversely, in DIO rats, the level of TRH was significantly increased [254]. Different routes of TRH application (IV, ICV, and SC) resulted in significantly reduced food intake and increased body temperature [25,257,258]. It has been described that TRH inhibits both food and water intake [259]. For example, the short-term reduction, with no concurrent reduction in body weight, occurs in rats following SC administration of TRH at dark onset [25]. Additionally, in another study, TRH decreased water intake when injected ICV [260]. However, in long-term treatment, with TRH administered twice daily for 5 days, it was observed that TRH did not reduce food intake, but instead, it increased water intake [25]. The reason for the stimulated water consumption is not clear. TRH administered both ICV and parenterally

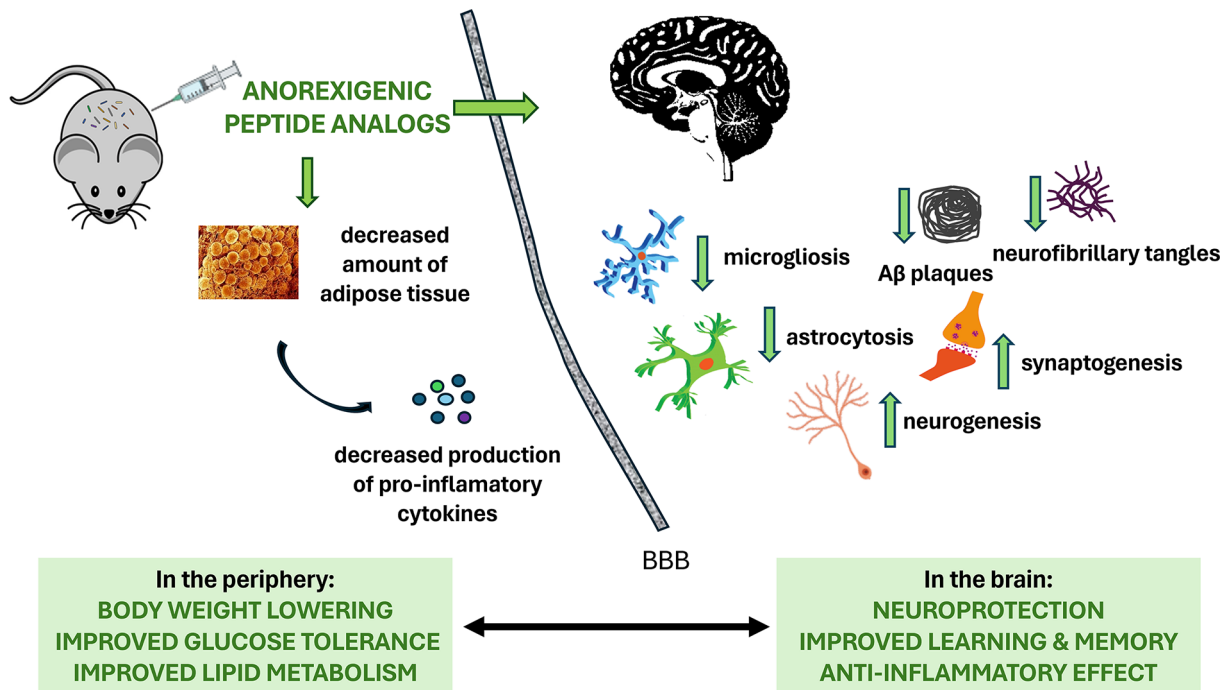

**Figure 2. Scheme of beneficial effects of anorexigenic neuropeptides or their modified analogs in the treatment of obesity and neurodegeneration**

Administration of anorexigenic neuropeptides or their modified analogs reduces food intake, resulting in weight loss and decreased white adipose tissue, known for pro-inflammatory cytokine secretion. This treatment further mitigates neuroinflammation, characterized by microgliosis, and astrocytosis, lowers levels of amyloid- $\beta$  ( $A\beta$ ), and diminishes neurofibrillary tangles formed by hyperphosphorylated Tau protein in the brain. Additionally, it promotes synaptogenesis and neurogenesis, leading to improved learning and memory.

BBB: blood brain barrier.

suppressed stress-induced eating. This effect was partially reversed by ICV administration of the long-acting synthetic enkephalin analog, suggesting that TRH and endogenous opiates may have a mutually antagonistic effect on ingestive behavior [261]. As shown in Table 1, chronic IP application of TRH to DIO mice reduced food intake and body weight, and improved metabolic parameters related to obesity, such as decreased levels of leptin, triglycerides, or cholesterol [262].

The role of TRH in AD is not well known; however, compared with healthy elderly controls, AD patients were shown to have decreased levels of TRH in the hippocampus [263]. A peptide analog of TRH, MK-771, improved spatial memory in a rat model of AD with medial septal lesions [264]. Moreover TRH could be implicated in the increased excitability of hippocampal CA1 neurons [265]. On the other hand, in a model of early-stage AD induced by intrahippocampal injection of okadaic acid, which enhances the activity of the Tau kinase GSK-3 $\beta$  and increases Tau phosphorylation, the level of TRH increases in the brain, as does the level of TRH in the blood serum [266].

## Conclusions and future directions

The use of anorexigenic neuropeptides for obesity or neurodegeneration treatment is still under investigation. Potential therapies targeting hypothalamic neuropeptide systems are in intensive preclinical research and have shown promising results for weight reduction, improvement of metabolic parameters, and amelioration of the loss of memory, neuroinflammation, or neurogenesis associated with neurodegenerative diseases.

While the hypothalamic ARC is not entirely isolated from the peripheral circulation, targeting central neuropeptide systems in other CNS regions requires overcoming the blood–brain barrier. This often requires high drug doses, elevating the risk of possible side effects. Therefore, anorexigenic neuropeptides and their peptide-based analogs pose challenges when administered through injectable options. To achieve a central biological effect on their receptors after peripheral administration, it is necessary to modify neuropeptides to enhance their stability and bioavailability. In this

review, we showed that anorexigenic neuropeptides, such as melanocortins, CARTp, PrRP, NPFF, PACAP, CRH and THR and their analogs not only decrease body weight, lower blood glucose levels, or ameliorate lipid profiles, but also improve cognitive impairment and the hallmarks of AD-like pathology in preclinical models (Figure 2).

Anorexigenic neuropeptides hold promise for addressing both obesity and neurodegeneration by modulating food intake, energy homeostasis, and displaying neuroprotective properties. Despite this potential, translating these discoveries into clinical practice presents significant challenges, including issues related to central nervous system access, side effects, and efficacy. These neuropeptides offer a promising avenue for developing neuropeptide receptor ligands with diverse pharmacological properties, and several analogs of anorexigenic peptides are currently undergoing pre-clinical trials. However, several obstacles persist, such as limited delivery to the brain and the need for comprehensive evaluation of their physiological effects, which may complicate their use in clinical trials. Nevertheless, they represent a valuable resource for developing novel pharmacological tools and therapeutic leads in both health and disease. However, targeting neuropeptides remains challenging due to the site of action and the route of administration.

### Competing Interests

The authors declare that there are no competing interests associated with the manuscript.

### Funding

The study was supported by National Institute for Research of Metabolic and Cardiovascular Diseases (Programme EXCELES, ID Project No. LX22NPO5104) – Funded by the European Union – Next Generation EU, by the Technology Agency of the Czech Republic, National center of competence – Personalized Medicine – Diagnostics and Therapy [grant number TN02000109], and Czech Academy of Sciences RVO: 61388963 and RVO: 67985823.

### CRedit Author Contribution

**V. Strnadová:** Conceptualization, Methodology, Writing—original draft, Writing—review & editing. **A. Pačesová:** Conceptualization, Supervision, Methodology, Writing—original draft, Writing—review & editing. **V. Charvát:** Investigation, Writing—original draft, Writing—review & editing. **Z. Šmotková:** Data curation, Writing—original draft, Writing—review & editing. **B. Železná:** Writing—review & editing. **J. Kuneš:** Funding acquisition, Writing—original draft, Writing—review & editing. **L. Maletínská:** Conceptualization, Supervision, Funding acquisition, Writing—original draft, Writing—review & editing.

### Abbreviations

AD, Alzheimer's disease; AgRP, agouti-related peptide; ARC, arcuate nucleus; BAT, brown adipose tissue; CART, cocaine- and amphetamine-regulated transcript; CNS, central nervous system; ERK, extracellular signal-regulated kinase; GPAP, glial fibrillary acidic protein; HPA, hypothalamic–pituitary–adrenal; IL, interleukin; ME, media eminence; MEG-FA, multiple ethylene glycol-fatty acid; NPAF, neuropeptide AF; NPFF, neuropeptide FF; NPY, neuropeptide Y; PACAP, pituitary adenylate cyclase-activating peptide; POMC, pro-opiomelanocortin; PrRP, prolactin-releasing peptide; TRH, thyrotropin-releasing hormone; WAT, white adipose tissue.

### References

- Guyenet, S.J. and Schwartz, M.W. (2012) Clinical review: Regulation of food intake, energy balance, and body fat mass: implications for the pathogenesis and treatment of obesity. *J. Clin. Endocrinol. Metab.* **97**, 745–755, <https://doi.org/10.1210/jc.2011-2525>
- Sobrinho Crespo, C., Perianes Cachero, A., Puebla Jimenez, L., Barrios, V. and Arilla Ferreira, E. (2014) Peptides and food intake. *Front. Endocrinol.* **5**, 58, <https://doi.org/10.3389/fendo.2014.00058>
- Joly-Amado, A., Cansell, C., Denis, R.G., Delbes, A.S., Castel, J., Martinez, S. et al. (2014) The hypothalamic arcuate nucleus and the control of peripheral substrates. *Best Pract. Res. Clin. Endocrinol. Metab.* **28**, 725–737, <https://doi.org/10.1016/j.beem.2014.03.003>
- Clayton, R.W., Lovell-Badge, R. and Galichet, C. (2022) The properties and functions of glial cell types of the hypothalamic median eminence. *Front. Endocrinol. (Lausanne)* **13**, 953995, <https://doi.org/10.3389/fendo.2022.953995>
- Jais, A. and Bruning, J.C. (2022) Arcuate nucleus-dependent regulation of metabolism—pathways to obesity and diabetes mellitus. *Endocr. Rev.* **43**, 314–328, <https://doi.org/10.1210/endoev/bnab025>
- Friedman, J.M. and Halaas, J.L. (1998) Leptin and the regulation of body weight in mammals. *Nature* **395**, 763–770, <https://doi.org/10.1038/27376>
- Frederich, R.C., Hamann, A., Anderson, S., Lollmann, B., Lowell, B.B. and Flier, J.S. (1995) Leptin levels reflect body lipid content in mice: evidence for diet-induced resistance to leptin action. *Nat. Med.* **1**, 1311–1314, <https://doi.org/10.1038/nm1295-1311>
- Perez-Leighton, C., Kerr, B., Scherer, P.E., Baudrand, R. and Cortes, V. (2023) The interplay between leptin, glucocorticoids, and GLP1 regulates food intake and feeding behaviour. *Biol. Rev. Camb. Philos. Soc.*, <https://doi.org/10.1111/brv.13039>
- Harris, R.B. (2014) Direct and indirect effects of leptin on adipocyte metabolism. *Biochim. Biophys. Acta* **1842**, 414–423, <https://doi.org/10.1016/j.bbadis.2013.05.009>



- 10 Kojima, M., Hosoda, H., Date, Y., Nakazato, M., Matsuo, H. and Kangawa, K. (1999) Ghrelin is a growth-hormone-releasing acylated peptide from stomach. *Nature* **402**, 656–660, <https://doi.org/10.1038/45230>
- 11 Lutz, T.A. (2009) Control of food intake and energy expenditure by amylin—therapeutic implications. *Int. J. Obes.* **33**, S24–S27, <https://doi.org/10.1038/ijo.2009.13>
- 12 Cawthon, C.R. and de La Serre, C.B. (2021) The critical role of CCK in the regulation of food intake and diet-induced obesity. *Peptides* **138**, 170492, <https://doi.org/10.1016/j.peptides.2020.170492>
- 13 Muller, T.D., Finan, B., Bloom, S.R., D'Alessio, D., Drucker, D.J., Flatt, P.R. et al. (2019) Glucagon-like peptide 1 (GLP-1). *Mol. Metab.* **30**, 72–130, <https://doi.org/10.1016/j.molmet.2019.09.010>
- 14 Karra, E., Chandarana, K. and Batterham, R.L. (2009) The role of peptide YY in appetite regulation and obesity. *J. Physiol.* **587**, 19–25, <https://doi.org/10.1113/jphysiol.2008.164269>
- 15 Cummings, D.E. and Overduin, J. (2007) Gastrointestinal regulation of food intake. *J. Clin. Invest.* **117**, 13–23, <https://doi.org/10.1172/JCI30227>
- 16 Valassi, E., Scacchi, M. and Cavagnini, F. (2008) Neuroendocrine control of food intake. *Nutr. Metab. Cardiovasc. Dis.* **18**, 158–168, <https://doi.org/10.1016/j.numecd.2007.06.004>
- 17 Lenard, N.R. and Berthoud, H.R. (2008) Central and peripheral regulation of food intake and physical activity: pathways and genes. *Obesity (Silver Spring)* **16**, S11–S22, <https://doi.org/10.1038/oby.2008.511>
- 18 Vrontakis, M.E. (2002) Galanin: a biologically active peptide. *Curr. Drug Targets CNS Neurol. Disord.* **1**, 531–541, <https://doi.org/10.2174/1568007023338914>
- 19 Qu, D., Ludwig, D.S., Gammeltoft, S., Piper, M., Pellemounter, M.A., Cullen, M.J. et al. (1996) A role for melanin-concentrating hormone in the central regulation of feeding behaviour. *Nature* **380**, 243–247, <https://doi.org/10.1038/380243a0>
- 20 Rodgers, R.J., Ishii, Y., Halford, J.C. and Blundell, J.E. (2002) Orexins and appetite regulation. *Neuropeptides* **36**, 303–325, [https://doi.org/10.1016/S0143-4179\(02\)00085-9](https://doi.org/10.1016/S0143-4179(02)00085-9)
- 21 Mastorakos, G. and Zapanti, E. (2004) The hypothalamic-pituitary-adrenal axis in the neuroendocrine regulation of food intake and obesity: the role of corticotropin releasing hormone. *Nutr. Neurosci.* **7**, 271–280, <https://doi.org/10.1080/10284150400020516>
- 22 Bozadjieva-Kramer, N., Ross, R.A., Johnson, D.Q., Fenselau, H., Haggerty, D.L., Atwood, B. et al. (2021) The role of mediobasal hypothalamic PACAP in the control of body weight and metabolism. *Endocrinology* **162**, <https://doi.org/10.1210/endo/bqab012>
- 23 Morley, J.E., Horowitz, M., Morley, P.M. and Flood, J.F. (1992) Pituitary adenylate cyclase activating polypeptide (PACAP) reduces food intake in mice. *Peptides* **13**, 1133–1135, [https://doi.org/10.1016/0196-9781\(92\)90019-Y](https://doi.org/10.1016/0196-9781(92)90019-Y)
- 24 Lawrence, C.B., Celsi, F., Brennand, J. and Luckman, S.M. (2000) Alternative role for prolactin-releasing peptide in the regulation of food intake. *Nat. Neurosci.* **3**, 645–646, <https://doi.org/10.1038/76597>
- 25 Choi, Y.H., Hartzell, D., Azain, M.J. and Baile, C.A. (2002) TRH decreases food intake and increases water intake and body temperature in rats. *Physiol. Behav.* **77**, 1–4, [https://doi.org/10.1016/S0031-9384\(02\)00784-9](https://doi.org/10.1016/S0031-9384(02)00784-9)
- 26 Arora, S. and Anubhuti (2006) Role of neuropeptides in appetite regulation and obesity—a review. *Neuropeptides* **40**, 375–401, <https://doi.org/10.1016/j.npep.2006.07.001>
- 27 Yu, J.H. and Kim, M.S. (2012) Molecular mechanisms of appetite regulation. *Diabetes Metab. J.* **36**, 391–398, <https://doi.org/10.4093/dmj.2012.36.6.391>
- 28 Kennedy, G.C. (1953) The role of depot fat in the hypothalamic control of food intake in the rat. *Proc. R. Soc. Lond. B Biol. Sci.* **140**, 578–596, <https://doi.org/10.1098/rspb.1953.0009>
- 29 Vaneckova, I., Maletinska, L., Behuliak, M., Nagelova, V., Zicha, J. and Kunes, J. (2014) Obesity-related hypertension: possible pathophysiological mechanisms. *J. Endocrinol.* **223**, R63–R78, <https://doi.org/10.1530/JOE-14-0368>
- 30 Kloock, S., Ziegler, C.G. and Dischinger, U. (2023) Obesity and its comorbidities, current treatment options and future perspectives: challenging bariatric surgery? *Pharmacol. Ther.* **251**, 108549, <https://doi.org/10.1016/j.pharmthera.2023.108549>
- 31 Alford, S., Patel, D., Perakakis, N. and Mantzoros, C.S. (2018) Obesity as a risk factor for Alzheimer's disease: weighing the evidence. *Obes. Rev.* **19**, 269–280, <https://doi.org/10.1111/obr.12629>
- 32 Rahman, M.M., Islam, M.R., Supti, F.A., Dhar, P.S., Shohag, S., Ferdous, J. et al. (2023) Exploring the therapeutic effect of neurotrophins and neuropeptides in neurodegenerative diseases: at a glance. *Mol. Neurobiol.* **60**, 4206–4231, <https://doi.org/10.1007/s12035-023-03328-5>
- 33 Pini, L., Pievani, M., Bocchetta, M., Altomare, D., Bosco, P., Cavado, E. et al. (2016) Brain atrophy in Alzheimer's disease and aging. *Ageing Res. Rev.* **30**, 25–48, <https://doi.org/10.1016/j.arr.2016.01.002>
- 34 Ball, M.J. (1977) Neuronal loss, neurofibrillary tangles and granulovacuolar degeneration in the hippocampus with ageing and dementia. A quantitative study. *Acta Neuropathol. (Berl)* **37**, 111–118, <https://doi.org/10.1007/BF00692056>
- 35 WHO (2016) Dementia. [cited 2024 30.01.]. Available from: <http://www.who.int/mediacentre/factsheets/fs362/en/>
- 36 Serrano-Pozo, A., Frosch, M.P., Masliah, E. and Hyman, B.T. (2011) Neuropathological alterations in Alzheimer disease. *Cold Spring Harb Perspect Med.* **1**, a006189, <https://doi.org/10.1101/cshperspect.a006189>
- 37 Flores-Cordero, J.A., Perez-Perez, A., Jimenez-Cortegana, C., Alba, G., Flores-Barragan, A. and Sanchez-Margalet, V. (2022) Obesity as a risk factor for dementia and Alzheimer's disease: the role of leptin. *Int. J. Mol. Sci.* **23**, <https://doi.org/10.3390/ijms23095202>
- 38 Liu, Y., Liu, F., Grundke-Iqbal, I., Iqbal, K. and Gong, C.X. (2011) Deficient brain insulin signalling pathway in Alzheimer's disease and diabetes. *J. Pathol.* **225**, 54–62, <https://doi.org/10.1002/path.2912>
- 39 Kacirova, M., Zmeskalova, A., Korinkova, L., Zelezna, B., Kunes, J. and Maletinska, L. (2020) Inflammation: major denominator of obesity, Type 2 diabetes and Alzheimer's disease-like pathology? *Clin. Sci. (Lond.)* **134**, 547–570, <https://doi.org/10.1042/CS20191313>
- 40 Nunomura, A. and Perry, G. (2020) RNA and oxidative stress in Alzheimer's disease: focus on microRNAs. *Oxid. Med. Cell Longev.* **2020**, 2638130, <https://doi.org/10.1155/2020/2638130>

- 41 Launer, L.J. (2002) Demonstrating the case that AD is a vascular disease: epidemiologic evidence. *Ageing Res. Rev.* **1**, 61–77, [https://doi.org/10.1016/S0047-6374\(01\)00364-5](https://doi.org/10.1016/S0047-6374(01)00364-5)
- 42 Lopez-Gambero, A.J., Rosell-Valle, C., Medina-Vera, D., Navarro, J.A., Vargas, A., Rivera, P. et al. (2021) A negative energy balance is associated with metabolic dysfunctions in the hypothalamus of a humanized preclinical model of Alzheimer's disease, the 5XFAD mouse. *Int. J. Mol. Sci.* **22**, <https://doi.org/10.3390/ijms22105365>
- 43 Akter, K., Lanza, E.A., Martin, S.A., Myronyuk, N., Rua, M. and Raffa, R.B. (2011) Diabetes mellitus and Alzheimer's disease: shared pathology and treatment? *Br. J. Clin. Pharmacol.* **71**, 365–376, <https://doi.org/10.1111/j.1365-2125.2010.03830.x>
- 44 Vanhanen, M., Koivisto, K., Moilanen, L., Helkala, E.L., Hanninen, T., Soininen, H. et al. (2006) Association of metabolic syndrome with Alzheimer disease: a population-based study. *Neurology* **67**, 843–847, <https://doi.org/10.1212/01.wnl.0000234037.91185.99>
- 45 Basaranoglu, M. and Neuschwander-Tetri, B.A. (2006) Nonalcoholic fatty liver disease: clinical features and pathogenesis. *Gastroenterol Hepatol (N Y)* **2**, 282–291
- 46 Li, X., Song, D. and Leng, S.X. (2015) Link between type 2 diabetes and Alzheimer's disease: from epidemiology to mechanism and treatment. *Clin. Interv. Aging.* **10**, 549–560, <https://doi.org/10.2147/CIA.S74042>
- 47 Maletinska, L., Popelova, A., Zelezna, B., Bencze, M. and Kunes, J. (2019) The impact of anorexigenic peptides in experimental models of Alzheimer's disease pathology. *J. Endocrinol.* **240**, R47–R72, <https://doi.org/10.1530/JOE-18-0532>
- 48 Chen, X.Y., Du, Y.F. and Chen, L. (2018) Neuropeptides exert neuroprotective effects in Alzheimer's disease. *Front. Mol. Neurosci.* **11**, 493, <https://doi.org/10.3389/fnmol.2018.00493>
- 49 Holscher, C. (2018) Novel dual GLP-1/GIP receptor agonists show neuroprotective effects in Alzheimer's and Parkinson's disease models. *Neuropharmacology* **136**, 251–259, <https://doi.org/10.1016/j.neuropharm.2018.01.040>
- 50 Cummings, J.L., Osse, A.M.L. and Kinney, J.W. (2023) Alzheimer's disease: novel targets and investigational drugs for disease modification. *Drugs* **83**, 1387–1408, <https://doi.org/10.1007/s40265-023-01938-w>
- 51 Paladugu, L., Gharaibeh, A., Kolli, N., Learman, C., Hall, T.C., Li, L. et al. (2021) Liraglutide has anti-inflammatory and anti-amyloid properties in streptozotocin-induced and 5xFAD mouse models of Alzheimer's Disease. *Int. J. Mol. Sci.* **22**, <https://doi.org/10.3390/ijms22020860>
- 52 Bader, M., Li, Y., Tweedie, D., Shlobin, N.A., Bernstein, A., Rubovitch, V. et al. (2019) Neuroprotective effects and treatment potential of incretin mimetics in a murine model of mild traumatic brain injury. *Front Cell Dev. Biol.* **7**, 356, <https://doi.org/10.3389/fcell.2019.00356>
- 53 Batista, A.F., Forny-Germano, L., Clarke, J.R., Lyra, E.S.N.M., Brito-Moreira, J., Boehnke, S.E. et al. (2018) The diabetes drug liraglutide reverses cognitive impairment in mice and attenuates insulin receptor and synaptic pathology in a non-human primate model of Alzheimer's disease. *J. Pathol.* **245**, 85–100, <https://doi.org/10.1002/path.5056>
- 54 Holubova, M., Hrubá, L., Popelova, A., Bencze, M., Prazienkova, V., Gengler, S. et al. (2019) Liraglutide and a lipidized analog of prolactin-releasing peptide show neuroprotective effects in a mouse model of beta-amyloid pathology. *Neuropharmacology* **144**, 377–387, <https://doi.org/10.1016/j.neuropharm.2018.11.002>
- 55 Duarte-Neves, J., Pereira de Almeida, L. and Cavadas, C. (2016) Neuropeptide Y (NPY) as a therapeutic target for neurodegenerative diseases. *Neurobiol. Dis.* **95**, 210–224, <https://doi.org/10.1016/j.nbd.2016.07.022>
- 56 Pain, S., Brot, S. and Gaillard, A. (2022) Neuroprotective effects of neuropeptide Y against neurodegenerative disease. *Curr. Neuropharmacol.* **20**, 1717–1725, <https://doi.org/10.2174/1570159X19666210906120302>
- 57 Reichmann, F. and Holzer, P. (2016) Neuropeptide Y: A stressful review. *Neuropeptides* **55**, 99–109, <https://doi.org/10.1016/j.npep.2015.09.008>
- 58 dos Santos, V.V., Santos, D.B., Lach, G., Rodrigues, A.L.S., Farina, M., De Lima, T.C.M. et al. (2013) Neuropeptide Y (NPY) prevents depressive-like behavior, spatial memory deficits and oxidative stress following amyloid- $\beta$  (A $\beta$ 1–40) administration in mice. *Behav. Brain Res.* **244**, 107–115, <https://doi.org/10.1016/j.bbr.2013.01.039>
- 59 Lee, N.K., Park, S.E., Kwon, S.J., Shim, S., Byeon, Y., Kim, J.-H. et al. (2017) Agouti related peptide secreted via human mesenchymal stem cells upregulates proteasome activity in an Alzheimer's disease model. *Sci. Rep.* **7**, 39340, <https://doi.org/10.1038/srep39340>
- 60 Calafate, S., Ozturan, G., Thrupp, N., Vanderlinden, J., Santa-Marinha, L., Morais-Ribeiro, R. et al. (2023) Early alterations in the MCH system link aberrant neuronal activity and sleep disturbances in a mouse model of Alzheimer's disease. *Nat. Neurosci.* **26**, 1021–1031, <https://doi.org/10.1038/s41593-023-01325-4>
- 61 Oh, S.T., Liu, Q.F., Jeong, H.J., Lee, S., Samidurai, M., Jo, J. et al. (2019) Nasal cavity administration of melanin-concentrating hormone improves memory impairment in memory-impaired and Alzheimer's disease mouse models. *Mol. Neurobiol.* **56**, 8076–8086, <https://doi.org/10.1007/s12035-019-01662-1>
- 62 Monzon, M.E., de Souza, M.M., Izquierdo, L.A., Izquierdo, I., Barros, D.M. and de Barioglio, S.R. (1999) Melanin-concentrating hormone (MCH) modifies memory retention in rats. *Peptides* **20**, 1517–1519, [https://doi.org/10.1016/S0196-9781\(99\)00164-3](https://doi.org/10.1016/S0196-9781(99)00164-3)
- 63 Varas, M., Pérez, M., Monzón, M.E. and de Barioglio, S.R. (2002) Melanin-concentrating hormone, hippocampal nitric oxide levels and memory retention. *Peptides* **23**, 2213–2221, [https://doi.org/10.1016/S0196-9781\(02\)00252-8](https://doi.org/10.1016/S0196-9781(02)00252-8)
- 64 Varas, M.M., Pérez, M.F., Ramirez, O.A. and de Barioglio, S.R. (2003) Increased susceptibility to LTP generation and changes in NMDA-NR1 and -NR2B subunits mRNA expression in rat hippocampus after MCH administration. *Peptides* **24**, 1403–1411, <https://doi.org/10.1016/j.peptides.2003.09.006>
- 65 Couvineau, A., Voisin, T., Nicole, P., Gratio, V., Abad, C. and Tan, Y.V. (2019) Orexins as novel therapeutic targets in inflammatory and neurodegenerative diseases. *Front Endocrinol. (Lausanne)* **10**, 709, <https://doi.org/10.3389/fendo.2019.00709>
- 66 Becquet, L., Abad, C., Leclercq, M., Miel, C., Jean, L., Riou, G. et al. (2019) Systemic administration of orexin A ameliorates established experimental autoimmune encephalomyelitis by diminishing neuroinflammation. *J. Neuroinflamm.* **16**, 64, <https://doi.org/10.1186/s12974-019-1447-y>
- 67 Liu, M.F., Xue, Y., Liu, C., Liu, Y.H., Diao, H.L., Wang, Y. et al. (2018) Orexin-A exerts neuroprotective effects via OX1R in Parkinson's disease. *Front Neurosci.* **12**, 835, <https://doi.org/10.3389/fnins.2018.00835>

- 68 Borroto-Escuela, D.O., Fores, R., Pita, M., Barbancho, M.A., Zamorano-Gonzalez, P., Casares, N.G. et al. (2022) Intranasal delivery of galanin 2 and neuropeptide Y1 agonists enhanced spatial memory performance and neuronal precursor cells proliferation in the dorsal hippocampus in rats. *Front Pharmacol.* **13**, 820210, <https://doi.org/10.3389/fphar.2022.820210>
- 69 Beltran-Casanueva, R., Hernández-García, A., de Amo García, P., Blanco-Reina, E., Serrano-Castro, P., García-Casares, N. et al. (2024) Neuropeptide Y receptor 1 and galanin receptor 2 (NPY1R-GALR2) interactions in the dentate gyrus and their relevance for neurogenesis and cognition. *Front Cell Neurosci.* **18**, 1323986, <https://doi.org/10.3389/fncel.2024.1323986>
- 70 Abbosh, C., Lawkowski, A., Zaben, M. and Gray, W. (2011) GalR2/3 mediates proliferative and trophic effects of galanin on postnatal hippocampal precursors. *J. Neurochem.* **117**, 425–436, <https://doi.org/10.1111/j.1471-4159.2011.07204.x>
- 71 Bertolini, A., Tacchi, R. and Vergoni, A.V. (2009) Brain effects of melanocortins. *Pharmacol. Res.* **59**, 13–47, <https://doi.org/10.1016/j.phrs.2008.10.005>
- 72 Harno, E. and White, A. (2016) Chapter 8 - Adrenocorticotrophic Hormone. In *Endocrinology: Adult and Pediatric (Seventh Edition)* (Jameson, J.L., De Groot, L.J., de Kretser, D.M., Giudice, L.C., Grossman, A.B., Melmed, S. et al., eds), pp. 129.e5–146.e5, W.B. Saunders, Philadelphia
- 73 Day, R. (2009) Proopiomelanocortin. *Encyclopedia Neurosci.* 1139–1141, <https://doi.org/10.1016/B978-008045046-9.01197-9>
- 74 Dores, R.M. (2009) Adrenocorticotrophic hormone, melanocyte-stimulating hormone, and the melanocortin receptors: revisiting the work of Robert Schwyzler: a thirty-year retrospective. *Ann. N. Y. Acad. Sci.* **1163**, 93–100, <https://doi.org/10.1111/j.1749-6632.2009.04434.x>
- 75 Wikberg, J.E., Muceniece, R., Mandrika, I., Prusis, P., Lindblom, J., Post, C. et al. (2000) New aspects on the melanocortins and their receptors. *Pharmacol. Res.* **42**, 393–420, <https://doi.org/10.1006/phrs.2000.0725>
- 76 Cone, R.D. (2006) Studies on the physiological functions of the melanocortin system. *Endocr. Rev.* **27**, 736–749, <https://doi.org/10.1210/er.2006-0034>
- 77 Yanik, T. and Durhan, S.T. (2023) Specific functions of melanocortin 3 receptor (MC3R). *J. Clin. Res. Pediatr Endocrinol.* **15**, 1–6, <https://doi.org/10.4274/jcrpe.galenos.2022.2022-5-21>
- 78 Ollmann, M.M., Wilson, B.D., Yang, Y.K., Kerns, J.A., Chen, Y., Gantz, I. et al. (1997) Antagonism of central melanocortin receptors in vitro and in vivo by agouti-related protein. *Science* **278**, 135–138, <https://doi.org/10.1126/science.278.5335.135>
- 79 Dutia, R., Kim, A.J., Modes, M., Rothlein, R., Shen, J.M., Tian, Y.E. et al. (2013) Effects of AgRP inhibition on energy balance and metabolism in rodent models. *PLoS ONE* **8**, e65317, <https://doi.org/10.1371/journal.pone.0065317>
- 80 Smith, A.I. and Funder, J.W. (1988) Proopiomelanocortin processing in the pituitary, central nervous system, and peripheral tissues. *Endocr. Rev.* **9**, 159–179, <https://doi.org/10.1210/edrv-9-1-159>
- 81 Kuhnlen, P., Krude, H. and Biebermann, H. (2019) Melanocortin-4 receptor signalling: importance for weight regulation and obesity treatment. *Trends Mol. Med.* **25**, 136–148, <https://doi.org/10.1016/j.molmed.2018.12.002>
- 82 Irani, B.G., Xiang, Z., Yarandi, H.N., Holder, J.R., Moore, M.C., Bauzo, R.M. et al. (2011) Implication of the melanocortin-3 receptor in the regulation of food intake. *Eur. J. Pharmacol.* **660**, 80–87, <https://doi.org/10.1016/j.ejphar.2010.10.101>
- 83 Huszar, D., Lynch, C.A., Fairchild-Huntress, V., Dunmore, J.H., Fang, Q., Berkemeier, L.R. et al. (1997) Targeted disruption of the melanocortin-4 receptor results in obesity in mice. *Cell* **88**, 131–141, [https://doi.org/10.1016/S0092-8674\(00\)81865-6](https://doi.org/10.1016/S0092-8674(00)81865-6)
- 84 Chen, A.S., Marsh, D.J., Trumbauer, M.E., Frazier, E.G., Guan, X.M., Yu, H. et al. (2000) Inactivation of the mouse melanocortin-3 receptor results in increased fat mass and reduced lean body mass. *Nat. Genet.* **26**, 97–102, <https://doi.org/10.1038/79254>
- 85 Farooqi, I.S., Yeo, G.S., Keogh, J.M., Aminian, S., Jebb, S.A., Butler, G. et al. (2000) Dominant and recessive inheritance of morbid obesity associated with melanocortin 4 receptor deficiency. *J. Clin. Invest.* **106**, 271–279, <https://doi.org/10.1172/JCI9397>
- 86 Krude, H., Biebermann, H., Luck, W., Horn, R., Brabant, G. and Gruters, A. (1998) Severe early-onset obesity, adrenal insufficiency and red hair pigmentation caused by POMC mutations in humans. *Nat. Genet.* **19**, 155–157, <https://doi.org/10.1038/509>
- 87 Butler, A.A. and Cone, R.D. (2002) The melanocortin receptors: lessons from knockout models. *Neuropeptides* **36**, 77–84, <https://doi.org/10.1054/npep.2002.0890>
- 88 Hansen, M.J., Schiøth, H.B. and Morris, M.J. (2005) Feeding responses to a melanocortin agonist and antagonist in obesity induced by a palatable high-fat diet. *Brain Res.* **1039**, 137–145, <https://doi.org/10.1016/j.brainres.2005.01.063>
- 89 Clegg, D.J., Benoit, S.C., Air, E.L., Jackman, A., Tso, P., D'Alessio, D. et al. (2003) Increased dietary fat attenuates the anorexic effects of intracerebroventricular injections of MTH. *Endocrinology* **144**, 2941–2946, <https://doi.org/10.1210/en.2002-0218>
- 90 Fan, W., Boston, B.A., Kesterson, R.A., Hruby, V.J. and Cone, R.D. (1997) Role of melanocortinergic neurons in feeding and the agouti obesity syndrome. *Nature* **385**, 165–168, <https://doi.org/10.1038/385165a0>
- 91 Marsh, D.J., Holloper, G., Huszar, D., Laufer, R., Yagaloff, K.A., Fisher, S.L. et al. (1999) Response of melanocortin-4 receptor-deficient mice to anorectic and orexigenic peptides. *Nat. Genet.* **21**, 119–122, <https://doi.org/10.1038/5070>
- 92 Chen, A.S., Metzger, J.M., Trumbauer, M.E., Guan, X.M., Yu, H., Frazier, E.G. et al. (2000) Role of the melanocortin-4 receptor in metabolic rate and food intake in mice. *Transgenic Res.* **9**, 145–154, <https://doi.org/10.1023/A:1008983615045>
- 93 Conde-Frieboes, K., Thogersen, H., Lau, J.F., Sensfuss, U., Hansen, T.K., Christensen, L. et al. (2012) Identification and in vivo and in vitro characterization of long acting and melanocortin 4 receptor (MC4-R) selective alpha-melanocyte-stimulating hormone (alpha-MSH) analogues. *J. Med. Chem.* **55**, 1969–1977, <https://doi.org/10.1021/jm201489a>
- 94 Fosgerau, K., Raun, K., Nilsson, C., Dahl, K. and Wulff, B.S. (2014) Novel alpha-MSH analog causes weight loss in obese rats and minipigs and improves insulin sensitivity. *J. Endocrinol.* **220**, 97–107, <https://doi.org/10.1530/JOE-13-0284>
- 95 Rodrigues, A.R., Salazar, M.J., Rocha-Rodrigues, S., Goncalves, I.O., Cruz, C., Neves, D. et al. (2019) Peripherally administered melanocortins induce mice fat browning and prevent obesity. *Int. J. Obes. (Lond.)* **43**, 1058–1069, <https://doi.org/10.1038/s41366-018-0155-5>
- 96 Kumar, K.G., Sutton, G.M., Dong, J.Z., Roubert, P., Plas, P., Halem, H.A. et al. (2009) Analysis of the therapeutic functions of novel melanocortin receptor agonists in MC3R- and MC4R-deficient C57BL/6J mice. *Peptides* **30**, 1892–1900, <https://doi.org/10.1016/j.peptides.2009.07.012>

- 97 Ma, K. and McLaurin, J. (2017) alpha-melanocyte stimulating hormone as a potential therapy for Alzheimer's disease. *Curr Alzheimer Res.* **14**, 18–29, <https://doi.org/10.2174/1567205013666160819130641>
- 98 Costa, A., Bini, P., Hamze-Sinno, M., Moglia, A., Franciotta, D., Sinfiorani, E. et al. (2011) Galanin and alpha-MSH autoantibodies in cerebrospinal fluid of patients with Alzheimer's disease. *J. Neuroimmunol.* **240–241**, 114–120, <https://doi.org/10.1016/j.jneuroim.2011.10.003>
- 99 Arai, H., Moroji, T., Kosaka, K. and Iizuka, R. (1986) Extrahypophyseal distribution of alpha-melanocyte stimulating hormone (alpha-MSH)-like immunoreactivity in postmortem brains from normal subjects and Alzheimer-type dementia patients. *Brain Res.* **377**, 305–310, [https://doi.org/10.1016/0006-8993\(86\)90873-5](https://doi.org/10.1016/0006-8993(86)90873-5)
- 100 Ma, K. and McLaurin, J. (2014) alpha-Melanocyte stimulating hormone prevents GABAergic neuronal loss and improves cognitive function in Alzheimer's disease. *J. Neurosci.* **34**, 6736–6745, <https://doi.org/10.1523/JNEUROSCI.5075-13.2014>
- 101 Forslin Aronsson, S., Spulber, S., Popescu, L.M., Winblad, B., Post, C., Oprica, M. et al. (2006) alpha-Melanocyte-stimulating hormone is neuroprotective in rat global cerebral ischemia. *Neuropeptides* **40**, 65–75, <https://doi.org/10.1016/j.npep.2005.10.006>
- 102 Giuliani, D., Zaffe, D., Ottani, A., Spaccapelo, L., Galantucci, M., Minutoli, L. et al. (2011) Treatment of cerebral ischemia with melanocortins acting at MC4 receptors induces marked neurogenesis and long-lasting functional recovery. *Acta Neuropathol.* **122**, 443–453, <https://doi.org/10.1007/s00401-011-0873-4>
- 103 Giuliani, D., Bitto, A., Galantucci, M., Zaffe, D., Ottani, A., Irrera, N. et al. (2014) Melanocortins protect against progression of Alzheimer's disease in triple-transgenic mice by targeting multiple pathophysiological pathways. *Neurobiol. Aging* **35**, 537–547, <https://doi.org/10.1016/j.neurobiolaging.2013.08.030>
- 104 Daini, E., Vandini, E., Bodria, M., Liao, W., Baraldi, C., Secco, V. et al. (2022) Melanocortin receptor agonist NDP-alpha-MSH improves cognitive deficits and microgliosis but not amyloidosis in advanced stages of AD progression in 5XFAD and 3xTg mice. *Front Immunol.* **13**, 1082036, <https://doi.org/10.3389/fimmu.2022.1082036>
- 105 Giuliani, D., Galantucci, M., Neri, L., Canalini, F., Calevro, A., Bitto, A. et al. (2014) Melanocortins protect against brain damage and counteract cognitive decline in a transgenic mouse model of moderate Alzheimers disease. *Eur. J. Pharmacol.* **740**, 144–150, <https://doi.org/10.1016/j.ejphar.2014.06.063>
- 106 Giuliani, D., Neri, L., Canalini, F., Calevro, A., Ottani, A., Vandini, E. et al. (2015) NDP-alpha-MSH induces intense neurogenesis and cognitive recovery in Alzheimer transgenic mice through activation of melanocortin MC4 receptors. *Mol. Cell. Neurosci.* **67**, 13–21, <https://doi.org/10.1016/j.mcn.2015.05.004>
- 107 Johnson, G.V. and Bailey, C.D. (2003) The p38 MAP kinase signaling pathway in Alzheimer's disease. *Exp. Neurol.* **183**, 263–268, [https://doi.org/10.1016/S0014-4886\(03\)00268-1](https://doi.org/10.1016/S0014-4886(03)00268-1)
- 108 Lau, J.K.Y., Tian, M., Shen, Y., Lau, S.F., Fu, W.Y., Fu, A.K.Y. et al. (2021) Melanocortin receptor activation alleviates amyloid pathology and glial reactivity in an Alzheimer's disease transgenic mouse model. *Sci. Rep.* **11**, 4359, <https://doi.org/10.1038/s41598-021-83932-4>
- 109 Douglass, J., McKinzie, A.A. and Couceyro, P. (1995) PCR differential display identifies a rat brain mRNA that is transcriptionally regulated by cocaine and amphetamine. *J. Neurosci.* **15**, 2471–2481, <https://doi.org/10.1523/JNEUROSCI.15-03-02471.1995>
- 110 Thim, L., Kristensen, P., Nielsen, P.F., Wulff, B.S. and Clausen, J.T. (1999) Tissue-specific processing of cocaine- and amphetamine-regulated transcript peptides in the rat. *Proc. Natl. Acad. Sci. U.S.A.* **96**, 2722–2727, <https://doi.org/10.1073/pnas.96.6.2722>
- 111 Thim, L., Nielsen, P.F., Judge, M.E., Andersen, A.S., Diers, I., Egel-Mitani, M. et al. (1998) Purification and characterisation of a new hypothalamic satiety peptide, cocaine and amphetamine regulated transcript (CART), produced in yeast. *FEBS Lett.* **428**, 263–268, [https://doi.org/10.1016/S0014-5793\(98\)00543-2](https://doi.org/10.1016/S0014-5793(98)00543-2)
- 112 Dey, A., Xhu, X., Carroll, R., Turck, C.W., Stein, J. and Steiner, D.F. (2003) Biological processing of the cocaine and amphetamine-regulated transcript precursors by prohormone convertases, PC2 and PC1/3. *J. Biol. Chem.* **278**, 15007–15014, <https://doi.org/10.1074/jbc.M212128200>
- 113 Stein, J., Steiner, D.F. and Dey, A. (2006) Processing of cocaine- and amphetamine-regulated transcript (CART) precursor proteins by prohormone convertases (PCs) and its implications. *Peptides* **27**, 1919–1925, <https://doi.org/10.1016/j.peptides.2005.10.028>
- 114 Spiess, J., Villarreal, J. and Vale, W.J.B. (1981) Isolation and sequence analysis of a somatostatin-like polypeptide from ovine hypothalamus. **20**, 1982–1988, <https://doi.org/10.1021/bi00510a038>
- 115 Dominguez, G. (2006) The CART gene: structure and regulation. *Peptides* **27**, 1913–1918, <https://doi.org/10.1016/j.peptides.2006.01.025>
- 116 Douglass, J. and Daoud, S. (1996) Characterization of the human cDNA and genomic DNA encoding CART: a cocaine- and amphetamine-regulated transcript. *Gene* **169**, 241–245, [https://doi.org/10.1016/0378-1119\(96\)88651-3](https://doi.org/10.1016/0378-1119(96)88651-3)
- 117 Yermolaieva, O., Chen, J., Couceyro, P.R. and Hoshi, T. (2001) Cocaine- and amphetamine-regulated transcript peptide modulation of voltage-gated Ca<sup>2+</sup> signaling in hippocampal neurons. *J. Neurosci.* **21**, 7474–7480, <https://doi.org/10.1523/JNEUROSCI.21-19-07474.2001>
- 118 Lakatos, A., Prinster, S., Vicentic, A., Hall, R.A. and Kuhar, M.J. (2005) Cocaine- and amphetamine-regulated transcript (CART) peptide activates the extracellular signal-regulated kinase (ERK) pathway in AT20 cells via putative G-protein coupled receptors. *Neurosci. Lett.* **384**, 198–202, <https://doi.org/10.1016/j.neulet.2005.04.072>
- 119 Vicentic, A., Lakatos, A. and Kuhar, M.J. (2005) CART (cocaine- and amphetamine-regulated transcript) peptide receptors: specific binding in AT20 cells. *Eur. J. Pharmacol.* **528**, 188–189, <https://doi.org/10.1016/j.ejphar.2005.11.041>
- 120 Maletinska, L., Maixnerova, J., Matyskova, R., Haugvicova, R., Sloncova, E., Elbert, T. et al. (2007) Cocaine- and amphetamine-regulated transcript (CART) peptide specific binding in pheochromocytoma cells PC12. *Eur. J. Pharmacol.* **559**, 109–114, <https://doi.org/10.1016/j.ejphar.2006.12.014>
- 121 Nagelova, V., Pirmik, Z., Zelezna, B. and Maletinska, L. (2014) CART (cocaine- and amphetamine-regulated transcript) peptide specific binding sites in PC12 cells have characteristics of CART peptide receptors. *Brain Res.* **1547**, 16–24, <https://doi.org/10.1016/j.brainres.2013.12.024>
- 122 Yosten, G.L., Harada, C.M., Haddock, C., Giancotti, L.A., Kolar, G.R., Patel, R. et al. (2020) GPR160 de-orphanization reveals critical roles in neuropathic pain in rodents. *J. Clin. Invest.* **130**, 2587–2592, <https://doi.org/10.1172/JCI133270>

- 123 Freitas-Lima, L.C., Pacesova, A., Stanurova, J., Sacha, P., Marek, A., Hubalek, M. et al. (2023) GPR160 is not a receptor of anorexigenic cocaine- and amphetamine-regulated transcript peptide. *Eur. J. Pharmacol.* **949**, 175713, <https://doi.org/10.1016/j.ejphar.2023.175713>
- 124 Gautvik, K.M., de Lecea, L., Gautvik, V.T., Danielson, P.E., Tranque, P., Dopazo, A. et al. (1996) Overview of the most prevalent hypothalamus-specific mRNAs, as identified by directional tag PCR subtraction. *Proc. Natl. Acad. Sci. U.S.A.* **93**, 8733–8738, <https://doi.org/10.1073/pnas.93.16.8733>
- 125 Koylu, E.O., Couceyro, P.R., Lambert, P.D., Ling, N.C., DeSouza, E.B. and Kuhar, M.J. (1997) Immunohistochemical localization of novel CART peptides in rat hypothalamus, pituitary and adrenal gland. *J. Neuroendocrinol.* **9**, 823–833, <https://doi.org/10.1046/j.1365-2826.1997.00651.x>
- 126 Jensen, P.B., Kristensen, P., Clausen, J.T., Judge, M.E., Hastrup, S., Thim, L. et al. (1999) The hypothalamic satiety peptide CART is expressed in anorectic and non-anorectic pancreatic islet tumors and in the normal islet of Langerhans. *FEBS Lett.* **447**, 139–143, [https://doi.org/10.1016/S0014-5793\(99\)00291-4](https://doi.org/10.1016/S0014-5793(99)00291-4)
- 127 Ekblad, E. (2006) CART in the enteric nervous system. *Peptides* **27**, 2024–2030, <https://doi.org/10.1016/j.peptides.2005.12.015>
- 128 Koylu, E.O., Couceyro, P.R., Lambert, P.D. and Kuhar, M.J. (1998) Cocaine- and amphetamine-regulated transcript peptide immunohistochemical localization in the rat brain. *J. Comp. Neurol.* **391**, 115–132, [https://doi.org/10.1002/\(SICI\)1096-9861\(19980202\)391:1%3c115::AID-CNE10%3e3.0.CO;2-X](https://doi.org/10.1002/(SICI)1096-9861(19980202)391:1%3c115::AID-CNE10%3e3.0.CO;2-X)
- 129 Asnicar, M.A., Smith, D.P., Yang, D.D., Heiman, M.L., Fox, N., Chen, Y.F. et al. (2001) Absence of cocaine- and amphetamine-regulated transcript results in obesity in mice fed a high caloric diet. *Endocrinology* **142**, 4394–4400, <https://doi.org/10.1210/endo.142.10.8416>
- 130 Wierup, N., Richards, W.G., Bannon, A.W., Kuhar, M.J., Ahrén, B. and Sundler, F. (2005) CART knock out mice have impaired insulin secretion and glucose intolerance, altered beta cell morphology and increased body weight. *Regul. Pept.* **129**, 203–211, <https://doi.org/10.1016/j.regpep.2005.02.016>
- 131 Bannon, A.W., Seda, J., Carmouche, M., Francis, J.M., Jarosinski, M.A. and Douglass, J. (2001) Multiple behavioral effects of cocaine- and amphetamine-regulated transcript (CART) peptides in mice: CART 42-89 and CART 49-89 differ in potency and activity. *J. Pharmacol. Exp. Ther.* **299**, 1021–1026
- 132 Lambert, P.D., Couceyro, P.R., McGirr, K.M., Dall Vechia, S.E., Smith, Y. and Kuhar, M.J. (1998) CART peptides in the central control of feeding and interactions with neuropeptide Y. *Synapse* **29**, 293–298, [https://doi.org/10.1002/\(SICI\)1098-2396\(199808\)29:4%3c293::AID-SYN1%3e3.0.CO;2-0](https://doi.org/10.1002/(SICI)1098-2396(199808)29:4%3c293::AID-SYN1%3e3.0.CO;2-0)
- 133 Kristensen, P., Judge, M.E., Thim, L., Ribel, U., Christjansen, K.N., Wulff, B.S. et al. (1998) Hypothalamic CART is a new anorectic peptide regulated by leptin. *Nature* **393**, 72–76, <https://doi.org/10.1038/29993>
- 134 Wang, Z.W., Zhou, Y.T., Kakuma, T., Lee, Y., Higa, M., Kalra, S.P. et al. (1999) Comparing the hypothalamic and extrahypothalamic actions of endogenous hyperleptinemia. *Proc. Natl. Acad. Sci. U.S.A.* **96**, 10373–10378, <https://doi.org/10.1073/pnas.96.18.10373>
- 135 Elias, C.F., Lee, C.E., Kelly, J.F., Ahima, R.S., Kuhar, M., Saper, C.B. et al. (2001) Characterization of CART neurons in the rat and human hypothalamus. *J. Comp. Neurol.* **432**, 1–19, <https://doi.org/10.1002/cne.1085>
- 136 Tian, D.R., Li, X.D., Shi, Y.S., Wan, Y., Wang, X.M., Chang, J.K. et al. (2004) Changes of hypothalamic alpha-MSH and CART peptide expression in diet-induced obese rats. *Peptides* **25**, 2147–2153, <https://doi.org/10.1016/j.peptides.2004.08.009>
- 137 Fekete, C., Mihaly, E., Luo, L.G., Kelly, J., Clausen, J.T., Mao, Q. et al. (2000) Association of cocaine- and amphetamine-regulated transcript-immunoreactive elements with thyrotropin-releasing hormone-synthesizing neurons in the hypothalamic paraventricular nucleus and its role in the regulation of the hypothalamic-pituitary-thyroid axis during fasting. *J. Neurosci.* **20**, 9224–9234, <https://doi.org/10.1523/JNEUROSCI.20-24-09224.2000>
- 138 Fekete, C. and Lechan, R.M. (2006) Neuroendocrine implications for the association between cocaine- and amphetamine regulated transcript (CART) and hypophysiotropic thyrotropin-releasing hormone (TRH). *Peptides* **27**, 2012–2018, <https://doi.org/10.1016/j.peptides.2005.11.029>
- 139 Pirnik, Z., Maixnerova, J., Matyskova, R., Koutova, D., Zelezna, B., Maletinska, L. et al. (2010) Effect of anorexigenic peptides, cholecystokinin (CCK) and cocaine and amphetamine regulated transcript (CART) peptide, on the activity of neurons in hypothalamic structures of C57Bl/6 mice involved in the food intake regulation. *Peptides* **31**, 139–144, <https://doi.org/10.1016/j.peptides.2009.09.035>
- 140 Maletinska, L., Maixnerova, J., Matyskova, R., Haugvicova, R., Pirnik, Z., Kiss, A. et al. (2008) Synergistic effect of CART (cocaine- and amphetamine-regulated transcript) peptide and cholecystokinin on food intake regulation in lean mice. *BMC Neuroscience* **9**, 101, <https://doi.org/10.1186/1471-2202-9-101>
- 141 Rohner-Jeanrenaud, F., Craft, L.S., Bridwell, J., Suter, T.M., Tinsley, F.C., Smiley, D.L. et al. (2002) Chronic central infusion of cocaine- and amphetamine-regulated transcript (CART 55-102): effects on body weight homeostasis in lean and high-fat-fed obese rats. *Int. J. Obes. Relat. Metab. Disord.* **26**, 143–149, <https://doi.org/10.1038/sj.ijo.0801863>
- 142 Wortley, K.E., Chang, G.Q., Davydova, Z., Fried, S.K. and Leibowitz, S.F. (2004) Cocaine- and amphetamine-regulated transcript in the arcuate nucleus stimulates lipid metabolism to control body fat accrual on a high-fat diet. *Regul. Pept.* **117**, 89–99, <https://doi.org/10.1016/j.regpep.2003.08.005>
- 143 Upadhyay, M.A., Nakhate, K.T., Kokare, D.M., Singru, P.S. and Subhedar, N.K. (2011) Cocaine- and amphetamine-regulated transcript peptide increases spatial learning and memory in rats. *Life Sci.* **88**, 322–334, <https://doi.org/10.1016/j.lfs.2010.12.008>
- 144 Jin, J.L., Liou, A.K., Shi, Y., Yin, K.L., Chen, L., Li, L.L. et al. (2015) CART treatment improves memory and synaptic structure in APP/PS1 mice. *Sci. Rep.* **5**, 10224, <https://doi.org/10.1038/srep10224>
- 145 Yin, K., Jin, J., Zhu, X., Yu, L., Wang, S., Qian, L. et al. (2017) CART modulates beta-amyloid metabolism-associated enzymes and attenuates memory deficits in APP/PS1 mice. *Neurol. Res.* **39**, 885–894, <https://doi.org/10.1080/01616412.2017.1348689>
- 146 Jiang, H., Niu, F., Zheng, Y. and Xu, Y. (2021) CART mitigates oxidative stress and DNA damage in memory deficits of APP/PS1 mice via upregulating beta-amyloid metabolism-associated enzymes. *Mol. Med. Rep.* **23**, <https://doi.org/10.3892/mmr.2021.11919>
- 147 Jiao, W., Wang, Y., Kong, L., Ou-Yang, T., Meng, Q., Fu, Q. et al. (2018) CART peptide activates the Nrf2/HO-1 antioxidant pathway and protects hippocampal neurons in a rat model of Alzheimer's disease. *Biochem. Biophys. Res. Commun.* **501**, 1016–1022, <https://doi.org/10.1016/j.bbrc.2018.05.101>

- 148 Hannibal, J., Mikkelsen, J.D., Clausen, H., Holst, J.J., Wulff, B.S. and Fahrenkrug, J. (1995) Gene expression of pituitary adenylate cyclase activating polypeptide (PACAP) in the rat hypothalamus. *Regul. Pept.* **55**, 133–148, [https://doi.org/10.1016/0167-0115\(94\)00099-J](https://doi.org/10.1016/0167-0115(94)00099-J)
- 149 Kivipelto, L., Absood, A., Arimura, A., Sundler, F., Hakanson, R. and Panula, P. (1992) The distribution of pituitary adenylate cyclase-activating polypeptide-like immunoreactivity is distinct from helodermin- and helospectin-like immunoreactivities in the rat brain. *J. Chem. Neuroanat.* **5**, 85–94, [https://doi.org/10.1016/0891-0618\(92\)90036-P](https://doi.org/10.1016/0891-0618(92)90036-P)
- 150 Koves, K., Arimura, A., Gorcs, T.G. and Somogyvari-Vigh, A. (1991) Comparative distribution of immunoreactive pituitary adenylate cyclase activating polypeptide and vasoactive intestinal polypeptide in rat forebrain. *Neuroendocrinology* **54**, 159–169, <https://doi.org/10.1159/000125864>
- 151 Sureshkumar, K., Saenz, A., Ahmad, S.M. and Lutfy, K. (2021) The PACAP/PAC1 receptor system and feeding. *Brain Sci.* **12**, <https://doi.org/10.3390/brainsci12010013>
- 152 Hawke, Z., Ivanov, T.R., Bechtold, D.A., Dhillon, H., Lowell, B.B. and Luckman, S.M. (2009) PACAP neurons in the hypothalamic ventromedial nucleus are targets of central leptin signaling. *J. Neurosci.* **29**, 14828–14835, <https://doi.org/10.1523/JNEUROSCI.1526-09.2009>
- 153 Mata-Pacheco, V., Hernandez, J., Varma, N., Xu, J., Sayers, S., Le, N. et al. (2024) Dynamic, sex- and diet-specific pleiotropism in the PAC1 receptor-mediated regulation of arcuate proopiomelanocortin and Neuropeptide Y/Agouti related peptide neuronal excitability by anorexigenic ventromedial nucleus PACAP neurons. *J. Neuroendocrinol.* **36**, e13357, <https://doi.org/10.1111/jne.13357>
- 154 Adams, B.A., Gray, S.L., Isaac, E.R., Bianco, A.C., Vidal-Puig, A.J. and Sherwood, N.M. (2008) Feeding and metabolism in mice lacking pituitary adenylate cyclase-activating polypeptide. *Endocrinology* **149**, 1571–1580, <https://doi.org/10.1210/en.2007-0515>
- 155 Vu, J.P., Luong, L., Sanford, D., Oh, S., Kuc, A., Pisegna, R. et al. (2023) PACAP and VIP neuropeptides' and receptors' effects on appetite, satiety and metabolism. *Biology (Basel.)* **12**, <https://doi.org/10.3390/biology12071013>
- 156 Kondo, T., Tominaga, T., Ichikawa, M. and Iijima, T. (1997) Differential alteration of hippocampal synaptic strength induced by pituitary adenylate cyclase activating polypeptide-38 (PACAP-38). *Neurosci. Lett.* **221**, 189–192, [https://doi.org/10.1016/S0304-3940\(96\)13323-1](https://doi.org/10.1016/S0304-3940(96)13323-1)
- 157 Toth, D., Reglodi, D., Schwieters, L. and Tamas, A. (2023) Role of endocrine PACAP in age-related diseases. *Front Endocrinol. (Lausanne)* **14**, 1118927, <https://doi.org/10.3389/fendo.2023.1118927>
- 158 Rat, D., Schmitt, U., Tippmann, F., Dewachter, I., Theunis, C., Wiczczak, E. et al. (2011) Neuropeptide pituitary adenylate cyclase-activating polypeptide (PACAP) slows down Alzheimer's disease-like pathology in amyloid precursor protein-transgenic mice. *FASEB J.* **25**, 3208–3218, <https://doi.org/10.1096/fj.10-180133>
- 159 Hinuma, S., Habata, Y., Fujii, R., Kawamata, Y., Hosoya, M., Fukusumi, S. et al. (1998) A prolactin-releasing peptide in the brain. *Nature* **393**, 272–276, <https://doi.org/10.1038/30515>
- 160 Samson, W.K., Resch, Z.T., Murphy, T.C. and Chang, J.K. (1998) Gender-biased activity of the novel prolactin releasing peptides: comparison with thyrotropin releasing hormone reveals only pharmacologic effects. *Endocrine* **9**, 289–291, <https://doi.org/10.1385/ENDO:9:3:289>
- 161 Jarry, H., Heuer, H., Schomburg, L. and Bauer, K. (2000) Prolactin-releasing peptides do not stimulate prolactin release in vivo. *Neuroendocrinology* **71**, 262–267, 54544, <https://doi.org/10.1159/000054544>
- 162 Boyle, R.G., Downham, R., Ganguly, T., Humphries, J., Smith, J. and Travers, S. (2005) Structure-activity studies on prolactin-releasing peptide (PrRP). Analogues of PrRP-(19-31)-peptide. *J. Peptide Sci.* **11**, 161–165, <https://doi.org/10.1002/psc.612>
- 163 Roland, B.L., Sutton, S.W., Wilson, S.J., Luo, L., Pyati, J., Huvar, R. et al. (1999) Anatomical distribution of prolactin-releasing peptide and its receptor suggests additional functions in the central nervous system and periphery. *Endocrinology* **140**, 5736–5745, <https://doi.org/10.1210/endo.140.12.7211>
- 164 Maletinska, L., Spolcova, A., Maixnerova, J., Blechova, M. and Zelezna, B. (2011) Biological properties of prolactin-releasing peptide analogs with a modified aromatic ring of a C-terminal phenylalanine amide. *Peptides* **32**, 1887–1892, <https://doi.org/10.1016/j.peptides.2011.08.011>
- 165 Engstrom, M., Brandt, A., Wurster, S., Savola, J.M. and Panula, P. (2003) Prolactin releasing peptide has high affinity and efficacy at neuropeptide FF2 receptors. *J. Pharmacol. Exp. Ther.* **305**, 825–832, <https://doi.org/10.1124/jpet.102.047118>
- 166 Maruyama, M., Matsumoto, H., Fujiwara, K., Kitada, C., Hinuma, S., Onda, H. et al. (1999) Immunocytochemical localization of prolactin-releasing peptide in the rat brain. *Endocrinology* **140**, 2326–2333, <https://doi.org/10.1210/endo.140.5.6685>
- 167 Matsumoto, H., Murakami, Y., Horikoshi, Y., Noguchi, J., Habata, Y., Kitada, C. et al. (1999) Distribution and characterization of immunoreactive prolactin-releasing peptide (PrRP) in rat tissue and plasma. *Biochem. Biophys. Res. Commun.* **257**, 264–268, <https://doi.org/10.1006/bbrc.1999.0463>
- 168 Fujii, R., Fukusumi, S., Hosoya, M., Kawamata, Y., Habata, Y., Hinuma, S. et al. (1999) Tissue distribution of prolactin-releasing peptide (PrRP) and its receptor. *Regul. Pept.* **83**, 1–10, [https://doi.org/10.1016/S0167-0115\(99\)00028-2](https://doi.org/10.1016/S0167-0115(99)00028-2)
- 169 Prazienkova, V., Popelova, A., Kunes, J. and Maletinska, L. (2019) Prolactin-releasing peptide: physiological and pharmacological properties. *Int. J. Mol. Sci.* **20**, <https://doi.org/10.3390/ijms20215297>
- 170 Seal, L.J., Small, C.J., Dhillon, W.S., Stanley, S.A., Abbott, C.R., Ghatei, M.A. et al. (2001) PRL-releasing peptide inhibits food intake in male rats via the dorsomedial hypothalamic nucleus and not the paraventricular hypothalamic nucleus. *Endocrinology* **142**, 4236–4243, <https://doi.org/10.1210/endo.142.10.8419>
- 171 Ellacott, K.L., Lawrence, C.B., Pritchard, L.E. and Luckman, S.M. (2003) Repeated administration of the anorectic factor prolactin-releasing peptide leads to tolerance to its effects on energy homeostasis. *Am. J. Physiol. Regul. Integr. Comp. Physiol.* **285**, R1005–R1010, <https://doi.org/10.1152/ajpregu.00237.2003>
- 172 Ellacott, K.L., Lawrence, C.B., Rothwell, N.J. and Luckman, S.M. (2002) PRL-releasing peptide interacts with leptin to reduce food intake and body weight. *Endocrinology* **143**, 368–374, <https://doi.org/10.1210/endo.143.2.8608>
- 173 Bechtold, D.A. and Luckman, S.M. (2006) Prolactin-releasing peptide mediates cholecystokinin-induced satiety in mice. *Endocrinology* **147**, 4723–4729, <https://doi.org/10.1210/en.2006-0753>

- 174 Takayanagi, Y., Matsumoto, H., Nakata, M., Mera, T., Fukusumi, S., Hinuma, S. et al. (2008) Endogenous prolactin-releasing peptide regulates food intake in rodents. *J. Clin. Invest.* **118**, 4014–4024, <https://doi.org/10.1172/JCI34682>
- 175 Bjursell, M., Lenneras, M., Goransson, M., Elmgren, A. and Bohlooly, Y.M. (2007) GPR10 deficiency in mice results in altered energy expenditure and obesity. *Biochem. Biophys. Res. Commun.* **363**, 633–638, <https://doi.org/10.1016/j.bbrc.2007.09.016>
- 176 Prazienkova, V., Funda, J., Pirnik, Z., Karnosova, A., Hrubá, L., Korinkova, L. et al. (2021) GPR10 gene deletion in mice increases basal neuronal activity, disturbs insulin sensitivity and alters lipid homeostasis. *Gene* **774**, 145427, <https://doi.org/10.1016/j.gene.2021.145427>
- 177 Maletinska, L., Nagelova, V., Ticha, A., Zemenova, J., Pirnik, Z., Holubova, M. et al. (2015) Novel lipidized analogs of prolactin-releasing peptide have prolonged half-lives and exert anti-obesity effects after peripheral administration. *Int. J. Obes.*, <https://doi.org/10.1038/ijo.2015.28>
- 178 Mikulaskova, B., Zemenova, J., Pirnik, Z., Prazienkova, V., Bednarova, L., Zelezna, B. et al. (2016) Effect of palmitoylated prolactin-releasing peptide on food intake and neural activation after different routes of peripheral administration in rats. *Peptides* **75**, 109–117, <https://doi.org/10.1016/j.peptides.2015.11.005>
- 179 Prazienková, V., Holubová, M., Pelantová, H., Bugáňová, M., Pirnik, Z., Mikulášková, B. et al. (2017) Impact of novel palmitoylated prolactin-releasing peptide analogs on metabolic changes in mice with diet-induced obesity. *PLoS ONE* **12**, e0183449, <https://doi.org/10.1371/journal.pone.0183449>
- 180 Holubova, M., Hrubá, L., Neprasova, B., Majercikova, Z., Lacinova, Z., Kunes, J. et al. (2018) Prolactin-releasing peptide improved leptin hypothalamic signaling in obese mice. *J. Mol. Endocrinol.* **60**, 85–94, <https://doi.org/10.1530/JME-17-0171>
- 181 Cermakova, M., Pelantova, H., Neprasova, B., Sediva, B., Maletinska, L., Kunes, J. et al. (2019) Metabolomic study of obesity and its treatment with palmitoylated prolactin-releasing peptide analog in spontaneously hypertensive and normotensive rats. *J. Proteome Res.* **18**, 1735–1750, <https://doi.org/10.1021/acs.jproteome.8b00964>
- 182 Holubova, M., Zemenova, J., Mikulaskova, B., Panajotova, V., Stohr, J., Haluzik, M. et al. (2016) Palmitoylated PrRP analog decreases body weight in DIO rats but not in ZDF rats. *J. Endocrinol.* **229**, 85–96, <https://doi.org/10.1530/JOE-15-0519>
- 183 Mrazikova, L., Hojna, S., Vaculova, P., Strnad, S., Vrkslav, V., Pelantova, H. et al. (2023) Lipidized PrRP analog exhibits strong anti-obesity and antidiabetic properties in Old WKY rats with obesity and glucose intolerance. *Nutrients* **15**, <https://doi.org/10.3390/nu15020280>
- 184 Mrazikova, L., Neprasova, B., Menger, A., Popelova, A., Strnadova, V., Hla, L. et al. (2021) Lipidized prolactin-releasing peptide as a new potential tool to treat obesity and type 2 diabetes mellitus: preclinical studies in rodent models. *Front Pharmacol.* **12**, 779962, <https://doi.org/10.3389/fphar.2021.779962>
- 185 Pflimlin, E., Lear, S., Lee, C., Yu, S., Zou, H., To, A. et al. (2019) Design of a long-acting and selective MEG-fatty acid stapled prolactin-releasing peptide analog. *ACS Med. Chem. Lett.* **10**, 1166–1172, <https://doi.org/10.1021/acsmchemlett.9b00182>
- 186 Prazienkova, V., Ticha, A., Blechova, M., Spolcova, A., Zelezna, B. and Maletinska, L. (2016) Pharmacological characterization of lipidized analogs of prolactin-releasing peptide with a modified C-terminal aromatic ring. *J. Physiol. Pharmacol.* **67**, 121–128
- 187 Alexopoulou, F., Bech, E.M., Pedersen, S.L., Thorbek, D.D., Leurs, U., Rudkjaer, L.C.B. et al. (2022) Lipidated PrRP31 metabolites are long acting dual GPR10 and NPFF2 receptor agonists with potent body weight lowering effect. *Sci. Rep.* **12**, 1696, <https://doi.org/10.1038/s41598-022-05310-y>
- 188 Spolcova, A., Mikulaskova, B., Holubova, M., Nagelova, V., Pirnik, Z., Zemenova, J. et al. (2015) Anorexigenic lipopeptides ameliorate central insulin signaling and attenuate tau phosphorylation in hippocampi of mice with monosodium glutamate-induced obesity. *J. Alzheimers Dis.* **45**, 823–835, <https://doi.org/10.3233/JAD-143150>
- 189 Popelova, A., Prazienkova, V., Neprasova, B., Kasperova, B.J., Hrubá, L., Holubova, M. et al. (2018) Novel lipidized analog of prolactin-releasing peptide improves memory impairment and attenuates hyperphosphorylation of tau protein in a mouse model of tauopathy. *J. Alzheimers Dis.* **62**, 1725–1736, <https://doi.org/10.3233/JAD-171041>
- 190 Menger, A., Hrubá, L., Exnerova, A., Holubova, M., Popelova, A., Zelezna, B. et al. (2021) Palmitoylated prolactin-releasing peptide reduced Abeta plaques and microgliosis in the cerebellum: APP/PS1 mice study. *Curr Alzheimer Res.*, <https://doi.org/10.2174/1567205018666210922110652>
- 191 Strnad, S., Prazienkova, V., Holubova, M., Sykora, D., Cvacka, J., Maletinska, L. et al. (2020) Mass spectrometry imaging of free-floating brain sections detects pathological lipid distribution in a mouse model of Alzheimer's-like pathology. *Analyst*, <https://doi.org/10.1039/D0AN00592D>
- 192 Jorgensen, S.K., Karnosova, A., Mazzaferro, S., Rowley, O., Chen, H.C., Robbins, S.J. et al. (2023) An analogue of the prolactin releasing peptide reduces obesity and promotes adult neurogenesis. *EMBO Rep.*, <https://doi.org/10.1038/s44319-023-00016-2>
- 193 Macias, M., Acha, B., Corroza, J., Urdanoz-Casado, A., Roldan, M., Robles, M. et al. (2023) Liquid biopsy in Alzheimer's disease patients reveals epigenetic changes in the PRLHR gene. *Cells* **12**, <https://doi.org/10.3390/cells12232679>
- 194 Yang, H.Y., Fratta, W., Majane, E.A. and Costa, E. (1985) Isolation, sequencing, synthesis, and pharmacological characterization of two brain neuropeptides that modulate the action of morphine. *Proc. Natl. Acad. Sci. U.S.A.* **82**, 7757–7761, <https://doi.org/10.1073/pnas.82.22.7757>
- 195 Panula, P., Aarnisalo, A.A. and Wasowicz, K. (1996) Neuropeptide FF, a mammalian neuropeptide with multiple functions. *Prog. Neurobiol.* **48**, 461–487, [https://doi.org/10.1016/0301-0082\(96\)00001-9](https://doi.org/10.1016/0301-0082(96)00001-9)
- 196 Vilim, F.S., Aarnisalo, A.A., Nieminen, M.L., Lintunen, M., Karlstedt, K., Kontinen, V.K. et al. (1999) Gene for pain modulatory neuropeptide NPFF: induction in spinal cord by noxious stimuli. *Mol. Pharmacol.* **55**, 804–811
- 197 Kivipelto, L. and Panula, P. (1991) Central neuronal pathways containing FLFQPRFamide-like (morphine-modulating) peptides in the rat brain. *Neuroscience* **41**, 137–148, [https://doi.org/10.1016/0306-4522\(91\)90204-2](https://doi.org/10.1016/0306-4522(91)90204-2)
- 198 Jhamandas, J.H., Jhamandas, A. and Harris, K.H. (2001) New central projections of neuropeptide FF: colateral branching pathways in the brainstem and hypothalamus in the rat. *J. Chem. Neuroanat.* **21**, 171–179, [https://doi.org/10.1016/S0891-0618\(01\)00094-1](https://doi.org/10.1016/S0891-0618(01)00094-1)
- 199 Gouarderes, C., Puget, A. and Zajac, J.M. (2004) Detailed distribution of neuropeptide FF receptors (NPFF1 and NPFF2) in the rat, mouse, octodon, rabbit, guinea pig, and marmoset monkey brains: a comparative autoradiographic study. *Synapse* **51**, 249–269, <https://doi.org/10.1002/syn.10305>
- 200 Bonini, J.A., Jones, K.A., Adham, N., Forray, C., Artymyshyn, R., Durkin, M.M. et al. (2000) Identification and characterization of two G protein-coupled receptors for neuropeptide FF. *J. Biol. Chem.* **275**, 39324–39331, <https://doi.org/10.1074/jbc.M004385200>

- 201 Roumy, M. and Zajac, J.M. (1998) Neuropeptide FF, pain and analgesia. *Eur. J. Pharmacol.* **345**, 1–11, [https://doi.org/10.1016/S0014-2999\(97\)01604-X](https://doi.org/10.1016/S0014-2999(97)01604-X)
- 202 Elhabazi, K., Trigo, J.M., Mollereau, C., Mouledous, L., Zajac, J.M., Bihel, F. et al. (2012) Involvement of neuropeptide FF receptors in neuroadaptive responses to acute and chronic opiate treatments. *Br. J. Pharmacol.* **165**, 424–435, <https://doi.org/10.1111/j.1476-5381.2011.01563.x>
- 203 Devillers, J.P., Mazarguil, H., Allard, M., Dickenson, A.H., Zajac, J.M. and Simonnet, G. (1994) Characterization of a potent agonist for NPFF receptors: binding study on rat spinal cord membranes. *Neuropharmacology* **33**, 661–669, [https://doi.org/10.1016/0028-3908\(94\)90172-4](https://doi.org/10.1016/0028-3908(94)90172-4)
- 204 Gicquel, S., Mazarguil, H., Allard, M., Simonnet, G. and Zajac, J.M. (1992) Analogues of F8Famide resistant to degradation, with high affinity and in vivo effects. *Eur. J. Pharmacol.* **222**, 61–67, [https://doi.org/10.1016/0014-2999\(92\)90463-E](https://doi.org/10.1016/0014-2999(92)90463-E)
- 205 Vyas, N., Mollereau, C., Cheve, G. and McCurdy, C.R. (2006) Structure-activity relationships of neuropeptide FF and related peptidic and non-peptidic derivatives. *Peptides* **27**, 990–996, <https://doi.org/10.1016/j.peptides.2005.07.024>
- 206 Simonin, F., Schmitt, M., Laulin, J.P., Laboureyras, E., Jhamandas, J.H., MacTavish, D. et al. (2006) RF9, a potent and selective neuropeptide FF receptor antagonist, prevents opioid-induced tolerance associated with hyperalgesia. *Proc. Natl. Acad. Sci. U.S.A.* **103**, 466–471, <https://doi.org/10.1073/pnas.0502090103>
- 207 Fang, Q., Wang, Y.Q., He, F., Guo, J., Guo, J., Chen, Q. et al. (2008) Inhibition of neuropeptide FF (NPFF)-induced hypothermia and anti-morphine analgesia by RF9, a new selective NPFF receptors antagonist. *Regul. Pept.* **147**, 45–51, <https://doi.org/10.1016/j.regpep.2007.12.007>
- 208 Maletinska, L., Ticha, A., Nagelova, V., Spolcova, A., Blechova, M., Elbert, T. et al. (2013) Neuropeptide FF analog RF9 is not an antagonist of NPFF receptor and decreases food intake in mice after its central and peripheral administration. *Brain Res.* **1498**, 33–40, <https://doi.org/10.1016/j.brainres.2012.12.037>
- 209 Murase, T., Arima, H., Kondo, K. and Oiso, Y. (1996) Neuropeptide FF reduces food intake in rats. *Peptides* **17**, 353–354, [https://doi.org/10.1016/0196-9781\(95\)02137-X](https://doi.org/10.1016/0196-9781(95)02137-X)
- 210 Sunter, D., Hewson, A.K., Lynam, S. and Dickson, S.L. (2001) Intracerebroventricular injection of neuropeptide FF, an opioid modulating neuropeptide, acutely reduces food intake and stimulates water intake in the rat. *Neurosci. Lett.* **313**, 145–148, [https://doi.org/10.1016/S0304-3940\(01\)02267-4](https://doi.org/10.1016/S0304-3940(01)02267-4)
- 211 Nicklous, D.M. and Simansky, K.J. (2003) Neuropeptide FF exerts pro- and anti-opioid actions in the parabrachial nucleus to modulate food intake. *Am. J. Physiol. Regul. Integr. Comp. Physiol.* **285**, R1046–R1054, <https://doi.org/10.1152/ajpregu.00107.2003>
- 212 Bechtold, D.A. and Luckman, S.M. (2007) The role of RFamide peptides in feeding. *J. Endocrinol.* **192**, 3–15, <https://doi.org/10.1677/JOE-06-0069>
- 213 Cline, M.A., Nandar, W. and Rogers, J.O. (2007) Central neuropeptide FF reduces feed consumption and affects hypothalamic chemistry in chicks. *Neuropeptides* **41**, 433–439, <https://doi.org/10.1016/j.npep.2007.08.003>
- 214 Cline, M.A., Newmyer, B.A. and Smith, M.L. (2009) The anorectic effect of neuropeptide AF is associated with satiety-related hypothalamic nuclei. *J. Neuroendocrinol.* **21**, 595–601, <https://doi.org/10.1111/j.1365-2826.2009.01876.x>
- 215 Maletinska, L., Ticha, A., Nagelova, V., Spolcova, A., Blechova, M., Elbert, T. et al. (2013) Neuropeptide FF analog RF9 is not an antagonist of NPFF receptor and decreases food intake in mice after its central and peripheral administration. *Brain Res.* **1498**, 33–40, <https://doi.org/10.1016/j.brainres.2012.12.037>
- 216 Waqas, S.F.H., Hoang, A.C., Lin, Y.T., Ampem, G., Azegrouz, H., Balogh, L. et al. (2017) Neuropeptide FF increases M2 activation and self-renewal of adipose tissue macrophages. *J. Clin. Invest.* **127**, 3559, <https://doi.org/10.1172/JCI95841>
- 217 Strnadova, V., Morgan, A., Skrliva, M., Haasova, E., Bardova, K., Myskova, A. et al. (2024) Peripheral administration of lipidized NPAF and NPFF analogs does not influence central food intake regulation but induces anxiety-like behavior. *Neuropeptides* **104**, 102417, <https://doi.org/10.1016/j.npep.2024.102417>
- 218 Roth, B.L., Disimone, J., Majane, E.A. and Yang, H.Y. (1987) Elevation of arterial pressure in rats by two new vertebrate peptides FLQPQRF-NH2 and AGEGLSPFWSLAAPQRF-NH2 which are immunoreactive to FMRF-NH2 antiserum. *Neuropeptides* **10**, 37–42, [https://doi.org/10.1016/0143-4179\(87\)90087-4](https://doi.org/10.1016/0143-4179(87)90087-4)
- 219 Jhamandas, J.H. and Goncharuk, V. (2013) Role of neuropeptide FF in central cardiovascular and neuroendocrine regulation. *Front. Endocrinol.* **4**, 8, <https://doi.org/10.3389/fendo.2013.00008>
- 220 Desprat, C. and Zajac, J.M. (1997) Hypothermic effects of neuropeptide FF analogues in mice. *Pharmacol. Biochem. Behav.* **58**, 559–563, [https://doi.org/10.1016/S0091-3057\(97\)00249-9](https://doi.org/10.1016/S0091-3057(97)00249-9)
- 221 Findelsen, M., Rathmann, D. and Beck-Sickinger, A.G. (2011) RFamide peptides: structure, function, mechanisms and pharmaceutical potential. **4**, 1248–1280, <https://doi.org/10.3390/ph4091248>
- 222 Kotlinska, J., Pachuta, A., Dylag, T. and Silberring, J. (2007) The role of neuropeptide FF (NPFF) in the expression of sensitization to hyperlocomotor effect of morphine and ethanol. *Neuropeptides* **41**, 51–58, <https://doi.org/10.1016/j.npep.2006.09.048>
- 223 Kotlinska, J., Pachuta, A. and Silberring, J. (2008) Neuropeptide FF (NPFF) reduces the expression of cocaine-induced conditioned place preference and cocaine-induced sensitization in animals. *Peptides* **29**, 933–939, <https://doi.org/10.1016/j.peptides.2008.01.008>
- 224 Kotlinska, J.H., Gibula-Brudzka, E., Koltunowska, D., Raof, H., Suder, P. and Silberring, J. (2012) Modulation of neuropeptide FF (NPFF) receptors influences the expression of amphetamine-induced conditioned place preference and amphetamine withdrawal anxiety-like behavior in rats. *Peptides* **33**, 156–163, <https://doi.org/10.1016/j.peptides.2011.12.002>
- 225 Cador, M., Marco, N., Stinus, L. and Simonnet, G. (2002) Interaction between neuropeptide FF and opioids in the ventral tegmental area in the behavioral response to novelty. *Neuroscience* **110**, 309–318, [https://doi.org/10.1016/S0304-4522\(01\)00587-5](https://doi.org/10.1016/S0304-4522(01)00587-5)
- 226 Kavaliers, M. and Colwell, D.D. (1993) Neuropeptide FF (FLQPQRFamide) and IgG from neuropeptide FF antiserum affect spatial learning in mice. *Neurosci. Lett.* **157**, 75–78, [https://doi.org/10.1016/0304-3940\(93\)90646-3](https://doi.org/10.1016/0304-3940(93)90646-3)
- 227 Betourne, A., Marty, V., Ceccom, J., Halley, H., Lassalle, J.M., Zajac, J.M. et al. (2010) Central locomotor and cognitive effects of a NPFF receptor agonist in mouse. *Peptides* **31**, 221–226, <https://doi.org/10.1016/j.peptides.2009.11.009>



- 228 Palotai, M., Telegdy, G., Tanaka, M., Bagosi, Z. and Jaszberenyi, M. (2014) Neuropeptide AF induces anxiety-like and antidepressant-like behavior in mice. *Behav. Brain Res.* **274**, 264–269, <https://doi.org/10.1016/j.bbr.2014.08.007>
- 229 Sun, S., Sun, S., Meng, Y., Shi, B. and Chen, Y. (2021) Elevated serum neuropeptide FF levels are associated with cognitive decline in patients with spinal cord injury. *Dis. Markers* **2021**, 4549049, <https://doi.org/10.1155/2021/4549049>
- 230 Craig, A., Guest, R., Tran, Y. and Middleton, J. (2017) Cognitive impairment and mood states after spinal cord injury. *J. Neurotrauma* **34**, 1156–1163, <https://doi.org/10.1089/neu.2016.4632>
- 231 Sundblom, D.M., Panula, P. and Fyhrquist, F. (1995) Neuropeptide FF-like immunoreactivity in human plasma. *Peptides* **16**, 347–350, [https://doi.org/10.1016/0196-9781\(94\)00163-4](https://doi.org/10.1016/0196-9781(94)00163-4)
- 232 Guillemin, R. and Rosenberg, B. (1955) Humoral hypothalamic control of anterior pituitary: a study with combined tissue cultures. *Endocrinology* **57**, 599–607, <https://doi.org/10.1210/endo-57-5-599>
- 233 Vale, W., Spiess, J., Rivier, C. and Rivier, J. (1981) Characterization of a 41-residue ovine hypothalamic peptide that stimulates secretion of corticotropin and beta-endorphin. *Science* **213**, 1394–1397, <https://doi.org/10.1126/science.6267699>
- 234 Owens, M.J. and Nemeroff, C.B. (1991) Physiology and pharmacology of corticotropin-releasing factor. *Pharmacol. Rev.* **43**, 425–473
- 235 Olschowska, J.A., O'Donohue, T.L., Mueller, G.P. and Jacobowitz, D.M. (1982) The distribution of corticotropin releasing factor-like immunoreactive neurons in rat brain. *Peptides* **3**, 995–1015, [https://doi.org/10.1016/0196-9781\(82\)90071-7](https://doi.org/10.1016/0196-9781(82)90071-7)
- 236 Grammatopoulos, D.K. and Ourailidou, S. (2017) CRH receptor signalling: potential roles in pathophysiology. *Curr. Mol. Pharmacol.* **10**, 296–310, <https://doi.org/10.2174/1874467210666170110125747>
- 237 Arase, K., York, D.A., Shimizu, H., Shargill, N. and Bray, G.A. (1988) Effects of corticotropin-releasing factor on food intake and brown adipose tissue thermogenesis in rats. *Am. J. Physiol.* **255**, E255–E259, <https://doi.org/10.1152/ajpendo.1988.255.3.E255>
- 238 Glowa, J.R. and Gold, P.W. (1991) Corticotropin releasing hormone produces profound anorexigenic effects in the rhesus monkey. *Neuropeptides* **18**, 55–61, [https://doi.org/10.1016/0143-4179\(91\)90164-E](https://doi.org/10.1016/0143-4179(91)90164-E)
- 239 Canet, G., Hernandez, C., Zussy, C., Chevallier, N., Desrumaux, C. and Givalois, L. (2019) Is AD a stress-related disorder? Focus on the HPA axis and its promising therapeutic targets. *Front. Aging Neurosci.* **11**, 269, <https://doi.org/10.3389/fnagi.2019.00269>
- 240 Vandael, D., Wierda, K., Vints, K., Baatsen, P., De Groef, L., Moons, L. et al. (2021) Corticotropin-releasing factor induces functional and structural synaptic remodelling in acute stress. *Transl. Psychiatry* **11**, 378, <https://doi.org/10.1038/s41398-021-01497-2>
- 241 Whitehouse, P.J., Vale, W.W., Zweig, R.M., Singer, H.S., Mayeux, R., Kuhar, M.J. et al. (1987) Reductions in corticotropin releasing factor-like immunoreactivity in cerebral cortex in Alzheimer's disease, Parkinson's disease, and progressive supranuclear palsy. *Neurology* **37**, 905–909, <https://doi.org/10.1212/WNL.37.6.905>
- 242 De Souza, E.B. (1995) Corticotropin-releasing factor receptors: physiology, pharmacology, biochemistry and role in central nervous system and immune disorders. *Psychoneuroendocrinology* **20**, 789–819, [https://doi.org/10.1016/0306-4530\(95\)00011-9](https://doi.org/10.1016/0306-4530(95)00011-9)
- 243 De Souza, E.B., Whitehouse, P.J., Kuhar, M.J., Price, D.L. and Vale, W.W. (1986) Reciprocal changes in corticotropin-releasing factor (CRF)-like immunoreactivity and CRF receptors in cerebral cortex of Alzheimer's disease. *Nature* **319**, 593–595, <https://doi.org/10.1038/319593a0>
- 244 Zhang, C., Kuo, C.C., Moghadam, S.H., Monte, L., Campbell, S.N., Rice, K.C. et al. (2016) Corticotropin-releasing factor receptor-1 antagonism mitigates beta amyloid pathology and cognitive and synaptic deficits in a mouse model of Alzheimer's disease. *Alzheimers Dementia* **12**, 527–537, <https://doi.org/10.1016/j.jalz.2015.09.007>
- 245 Dong, H., Wang, S., Zeng, Z., Li, F., Montalvo-Ortiz, J., Tucker, C. et al. (2014) Effects of corticotropin-releasing factor receptor 1 antagonists on amyloid-beta and behavior in Tg2576 mice. *Psychopharmacology (Berl.)* **231**, 4711–4722, <https://doi.org/10.1007/s00213-014-3629-8>
- 246 Carroll, J.C., Iba, M., Bangasser, D.A., Valentino, R.J., James, M.J., Brunden, K.R. et al. (2011) Chronic stress exacerbates tau pathology, neurodegeneration, and cognitive performance through a corticotropin-releasing factor receptor-dependent mechanism in a transgenic mouse model of tauopathy. *J. Neurosci.* **31**, 14436–14449, <https://doi.org/10.1523/JNEUROSCI.3836-11.2011>
- 247 Dong, H., Keegan, J.M., Hong, E., Gallardo, C., Montalvo-Ortiz, J., Wang, B. et al. (2018) Corticotropin releasing factor receptor 1 antagonists prevent chronic stress-induced behavioral changes and synapse loss in aged rats. *Psychoneuroendocrinology* **90**, 92–101, <https://doi.org/10.1016/j.psyneuen.2018.02.013>
- 248 Lechan, R.M. and Jackson, I.M. (1982) Immunohistochemical localization of thyrotropin-releasing hormone in the rat hypothalamus and pituitary. *Endocrinology* **111**, 55–65, <https://doi.org/10.1210/endo-111-1-55>
- 249 Guo, F., Bakal, K., Minokoshi, Y. and Hollenberg, A.N. (2004) Leptin signaling targets the thyrotropin-releasing hormone gene promoter in vivo. *Endocrinology* **145**, 2221–2227, <https://doi.org/10.1210/en.2003-1312>
- 250 Kim, M.S., Small, C.J., Russell, S.H., Morgan, D.G., Abbott, C.R., alAhmed, S.H. et al. (2002) Effects of melanocortin receptor ligands on thyrotropin-releasing hormone release: evidence for the differential roles of melanocortin 3 and 4 receptors. *J. Neuroendocrinol.* **14**, 276–282, <https://doi.org/10.1046/j.1365-2826.2002.00769.x>
- 251 Fekete, C., Kelly, J., Mihaly, E., Sarkar, S., Rand, W.M., Legradi, G. et al. (2001) Neuropeptide Y has a central inhibitory action on the hypothalamic-pituitary-thyroid axis. *Endocrinology* **142**, 2606–2613, <https://doi.org/10.1210/endo.142.6.8207>
- 252 Schaner, P., Todd, R.B., Seidah, N.G. and Nilni, E.A. (1997) Processing of prothyrotropin-releasing hormone by the family of prohormone convertases. *J. Biol. Chem.* **272**, 19958–19968, <https://doi.org/10.1074/jbc.272.32.19958>
- 253 Trubacova, R., Drastichova, Z. and Novotny, J. (2022) Biochemical and physiological insights into TRH receptor-mediated signaling. *Front. Cell Dev. Biol.* **10**, 981452, <https://doi.org/10.3389/fcell.2022.981452>
- 254 Perello, M., Cakir, I., Cyr, N.E., Romero, A., Stuart, R.C., Chiappini, F. et al. (2010) Maintenance of the thyroid axis during diet-induced obesity in rodents is controlled at the central level. *Am. J. Physiol. Endocrinol. Metab.* **299**, E976–E989, <https://doi.org/10.1152/ajpendo.00448.2010>
- 255 Blake, N.G., Eckland, D.J., Foster, O.J. and Lightman, S.L. (1991) Inhibition of hypothalamic thyrotropin-releasing hormone messenger ribonucleic acid during food deprivation. *Endocrinology* **129**, 2714–2718, <https://doi.org/10.1210/endo-129-5-2714>

- 256 van Haasteren, G.A., Linkels, E., Klootwijk, W., van Toor, H., Rondeel, J.M., Themmen, A.P. et al. (1995) Starvation-induced changes in the hypothalamic content of prothyrotrophin-releasing hormone (proTRH) mRNA and the hypothalamic release of proTRH-derived peptides: role of the adrenal gland. *J. Endocrinol.* **145**, 143–153, <https://doi.org/10.1677/joe.0.1450143>
- 257 Vijayan, E. and McCann, S.M. (1977) Suppression of feeding and drinking activity in rats following intraventricular injection of thyrotropin releasing hormone (TRH). *Endocrinology* **100**, 1727–1730, <https://doi.org/10.1210/endo-100-6-1727>
- 258 Steward, C.A., Horan, T.L., Schuhler, S., Bennett, G.W. and Ebling, F.J. (2003) Central administration of thyrotropin releasing hormone (TRH) and related peptides inhibits feeding behavior in the Siberian hamster. *Neuroreport* **14**, 687–691, <https://doi.org/10.1097/00001756-200304150-00006>
- 259 Nilni, E.A. (2010) Regulation of the hypothalamic thyrotropin releasing hormone (TRH) neuron by neuronal and peripheral inputs. *Front. Neuroendocrinol.* **31**, 134–156, <https://doi.org/10.1016/j.yfrne.2010.01.001>
- 260 Suzuki, T., Kohno, H., Sakurada, T., Tadano, T. and Kisara, K. (1982) Intracranial injection of thyrotropin releasing hormone (TRH) suppresses starvation-induced feeding and drinking in rats. *Pharmacol. Biochem. Behav.* **17**, 249–253, [https://doi.org/10.1016/0091-3057\(82\)90078-8](https://doi.org/10.1016/0091-3057(82)90078-8)
- 261 Morley, J.E. and Levine, A.S. (1980) Thyrotropin releasing hormone (TRH) suppresses stress induced eating. *Life Sci.* **27**, 269–274, [https://doi.org/10.1016/0024-3205\(80\)90147-2](https://doi.org/10.1016/0024-3205(80)90147-2)
- 262 Pierpaoli, W. and Lesnikov, V.A. (2011) Effects of long-term intraperitoneal injection of thyrotropin-releasing hormone (TRH) on aging- and obesity-related changes in body weight, lipid metabolism, and thyroid functions. *Curr Aging Sci.* **4**, 25–32, <https://doi.org/10.2174/1874609811104010025>
- 263 Luo, L., Yano, N., Mao, Q., Jackson, I.M. and Stopa, E.G. (2002) Thyrotropin releasing hormone (TRH) in the hippocampus of Alzheimer patients. *J. Alzheimers Dis.* **4**, 97–103, <https://doi.org/10.3233/JAD-2002-4204>
- 264 Horita, A., Carino, M.A., Zabawska, J. and Lai, H. (1989) TRH analog MK-771 reverses neurochemical and learning deficits in medial septal-lesioned rats. *Peptides* **10**, 121–124, [https://doi.org/10.1016/0196-9781\(89\)90087-9](https://doi.org/10.1016/0196-9781(89)90087-9)
- 265 Stocca, G. and Nistri, A. (1996) The neuropeptide thyrotropin-releasing hormone modulates GABAergic synaptic transmission on pyramidal neurones of the rat hippocampal slice. *Peptides* **17**, 1197–1202, [https://doi.org/10.1016/S0196-9781\(96\)00128-3](https://doi.org/10.1016/S0196-9781(96)00128-3)
- 266 Ren, B., Ma, J., Tao, M., Jing, G., Han, S., Zhou, C. et al. (2023) The disturbance of thyroid-associated hormone and its receptors in brain and blood circulation existed in the early stage of mouse model of Alzheimer's disease. *Aging (Albany NY)* **15**, 1591–1602, <https://doi.org/10.18632/aging.204570>
